1 **Targeted Anatomical and Functional Identification of Antinociceptive and**  
2 **Pronociceptive Serotonergic Neurons that Project to the Spinal Dorsal Horn**

3  
4 Abbreviated title: Descending Serotonergic Projection Neurons

5 Robert P. Ganley<sup>1</sup>, Marília Magalhaes de Sousa<sup>1</sup>, Kira Werder<sup>1</sup>, Tugce Öztürk<sup>1</sup>, Raquel  
6 Mendes<sup>1</sup>, Matteo Ranucci<sup>1</sup>, Hendrik Wildner<sup>1</sup> & Hanns Ulrich Zeilhofer<sup>1,2</sup>

7  
8 <sup>1</sup>Institute for Pharmacology and Toxicology, University of Zürich, CH-8057 Zürich,  
9 Switzerland

10 <sup>2</sup>Institute of Pharmaceutical Sciences, Swiss Federal Institute of Technology Zürich, CH-  
11 8090, Zürich, Switzerland

12  
13  
14  
15 Corresponding author: [zeilhofer@pharma.uzh.ch](mailto:zeilhofer@pharma.uzh.ch)

16  
17 Pages: 42

18 Figures: 6

19 Figure supplements: 13

20 Tables: 8

21 Number of words

22 Abstract: 202

23 Introduction: 601

24 Discussion: 1910

25  
26 Conflict of interest: none

27  
28 Acknowledgements: We are grateful for funding provided by grants from the Swiss National  
29 Science Foundation (grant number 310030\_197888) and by the clinical research priority  
30 programme (CRPP) “Pain – from phenotypes to mechanisms” of the Faculty of Medicine,  
31 University of Zurich, to HUZ, and a grant from the Olga Mayenfisch Stiftung to HW. We thank  
32 Louis Scheurer, Katharina Struckmeyer-Fichtel, and Isabelle Kellenberger for technical  
33 support.

34

35

1 **Abstract**

2 Spinally-projecting serotonergic neurons play a key role in controlling pain sensitivity and can  
3 either increase or decrease nociception depending on physiological context. It is currently  
4 unknown how serotonergic neurons mediate these opposing effects. Utilizing virus-based  
5 strategies, we identified two anatomically separated populations of serotonergic hindbrain  
6 neurons located in the lateral paragigantocellularis (LPGi) and the medial hindbrain, which  
7 respectively innervate the superficial and deep spinal dorsal horn and have contrasting  
8 effects on sensory perception. Our tracing experiments revealed that serotonergic neurons of  
9 the LPGi were much more susceptible to transduction with spinally injected AAV2retro  
10 vectors than medial hindbrain serotonergic neurons. Taking advantage of this difference, we  
11 employed intersectional chemogenetic approaches to demonstrate that activation of the LPGi  
12 serotonergic projections decreases thermal sensitivity, whereas activation of medial  
13 serotonergic neurons increases sensitivity to mechanical von Frey stimulation. Together  
14 these results suggest that there are functionally distinct classes of serotonergic hindbrain  
15 neurons that differ in their anatomical location in the hindbrain, their postsynaptic targets in  
16 the spinal cord, and their impact on nociceptive sensitivity. The LPGi neurons that give rise to  
17 rather global and bilateral projections throughout the rostrocaudal extent of the spinal cord  
18 appear to be ideally posed to contribute to widespread systemic pain control.

19

## 1 **Introduction**

2 Descending pain control is a critical endogenous mechanism of pain modulation that is  
3 required for survival [47], and allows an organism to respond in an appropriate context-  
4 dependent manner to external threats. Key brain structures involved in this system were  
5 discovered through stimulation-produced analgesia experiments and include the  
6 periaqueductal grey matter (PAG) and the rostroventromedial medulla (RVM) of the  
7 hindbrain [9]. This descending system acts to inhibit the flow of nociceptive information  
8 through the spinal dorsal horn and requires descending tracts within the dorsolateral  
9 funiculus to mediate its effects [8; 10]. The RVM is also required for maintaining some  
10 chronic pain states through a process of descending facilitation [54; 74], indicating that this  
11 area has a bidirectional control over pain sensitivity. Both descending inhibition and  
12 facilitation will ultimately require the activation of descending tracts to modulate the neuronal  
13 activity within the dorsal horn. To understand the precise neuronal circuitry and transmitter  
14 systems underlying descending pain inhibition and facilitation, an understanding of the  
15 different projection neurons from the RVM to the spinal cord is needed.

16 Monoamines are important neurotransmitters involved in descending pain control, with  
17 serotonin (5-HT) being able to inhibit nociception when injected intrathecally [64]. Spinal 5-  
18 HT is also known to contribute to certain forms of endogenous pain suppression, such as  
19 stress-induced analgesia [72], but is also required to maintain chronic pain in rodent models  
20 of nerve injury [66]. This pain facilitation in pre-clinical neuropathy models is thought to be a  
21 result of reduced tonic diffuse noxious inhibitory controls, due to increased spinal 5-HT<sub>3</sub>  
22 receptor activation [4; 6]. The variety and abundance of 5-HT receptors within the spinal  
23 dorsal horn likely explains, at least in part, why these multiple effects are observed [7].  
24 Clearly, spinal 5-HT and the serotonergic projections to this region have a complex and  
25 bidirectional control over pain perception that require further study.

1 Functional studies of specific descending projections have been facilitated by the  
2 development of viral retrograde tracers, such as AAV2retro and canine adenoviruses [25; 35;  
3 60]. However, it has been reported that the AAV2retro serotype, may not infect serotonergic  
4 hindbrain neurons as efficiently as other descending projections [60; 65]. Further, despite the  
5 dense serotonergic innervation of the spinal dorsal horn, studies employing transsynaptic  
6 neuronal circuit tracing from dorsal horn neurons with modified rabies viruses rarely found  
7 labeled hindbrain serotonergic neurons [25; 43]. This is surprising since both descending  
8 serotonergic neurons and dorsal horn interneurons are known to strongly influence  
9 nociception, and it is possible that these rabies virus-based tracers fail to detect functional  
10 connections between serotonergic neurons and starter populations within the spinal cord.  
11 Together these reports would suggest that descending serotonergic projections of the  
12 hindbrain are particularly challenging to study using the currently available tools.

13 In an attempt to address this discrepancy, we compared the labeling efficiency of viral and  
14 non-viral tracers. Specifically, we examined the susceptibility of serotonergic hindbrain  
15 neurons to retrograde spinal transduction by AAV2retro serotype vectors [60]. Additionally,  
16 we traced serotonergic neurons of the hindbrain with modified rabies viruses and tested  
17 whether they could be labelled from dorsal horn neuron starter populations with transsynaptic  
18 rabies tracing. To allow functional interrogation of descending serotonergic neurons, we  
19 assessed the specificity of the TPH2::Cre mouse line and used this together with the  
20 preferential transduction efficiency of AAV2retro to develop an intersectional system that  
21 allowed selective labelling and manipulation of serotonergic neurons in the lateral  
22 paragigantocellularis (LPGi), or the medial serotonergic neurons including the nucleus raphe  
23 magnus (NRM). We find that the lateral and medial serotonergic neurons of the RVM are  
24 distinct in terms of their anatomical organization, susceptibility to AAV2retro transduction,  
25 and influence on acute nociception.

26



## 1 **Results**

### 2 *Spinal injection of AAV2retro serotype vectors preferentially transduce TPH2-containing* 3 *projection neurons in the lateral hindbrain*

4 AAV vectors have been developed to permit the efficient retrograde labelling of projection  
5 neurons via their axon terminals [60]. However, it is debatable whether these vectors are  
6 capable of transducing serotonergic neurons that project to the spinal cord [65]. To test this,  
7 we used AAV2retro serotype vectors to retrogradely label hindbrain neurons that project to  
8 the spinal cord to assess their ability to transduce serotonergic projection neurons (Figure  
9 1A). Following intraspinal injection of AAV2retro.GFP, many transduced neurons were  
10 labelled within the RVM (Figure 1B). When we inspected the location of neurons that  
11 expressed both TPH2 and eGFP (according to scheme depicted in Figure 1- figure  
12 supplement 1), we found that the majority of these cells were located within the lateral  
13 paragigantocellularis (LPGi) (Figure 1B). Quantification of the location of the eGFP-labelled  
14 TPH2-expressing neurons indicated that 74% were in the LPGi both ipsilateral and  
15 contralateral to the spinal cord injection site (left hand side). In agreement with [65], far fewer  
16 eGFP+TPH2+ neurons were found within the midline serotonergic nuclei (23/100 neurons in  
17 NRM, (n = 3 animals) (Figure 1C). However, most non-serotonergic projection neurons  
18 (eGFP+ TPH2-) were found close to the midline of the ventral hindbrain (412/439 neurons in  
19 midline, (n = 3 animals) (see Figure 1B and Figure 1E)

20 There is increasing evidence to suggest that some projections are resistant to retrograde  
21 transduction with AAV2retro vectors, and comparisons with independent tracing methods are  
22 required to demonstrate this resistance [26; 60]. To study the anatomical organization of  
23 serotonergic pathways using a non-viral method, we used Cholera toxin b subunit (CTb)  
24 retrograde tracing and compared the hindbrain labelling with our AAV2retro tracing  
25 experiments (Figure 1- figure supplement 2A).

1 Strikingly, many CTb-labeled TPH2-expressing hindbrain neurons were found in the midline  
2 NRM, although CTb-containing TPH2-expressing neurons were also found in the LPGi  
3 (Figure 1 - figure supplement 2B). The location of these CTb+TPH2+ cells was more evenly  
4 divided between the NRM and LPGi than the eGFP+TPH2+ cells from the AAV2retro labelling  
5 (Figure 1 - figure supplement 2C compared to Figure 1C). To directly test whether there were  
6 differences in labelling efficiency between AAV2retro and CTb, AAV2retro.GFP and CTb  
7 were co-injected into the spinal dorsal horn (Figure 1D). In total, more neurons in the ventral  
8 hindbrain were retrogradely labelled with CTb than AAV2retro.eGFP (Figure 1 – figure  
9 supplement 3A and table 1). When only TPH2-expressing retrogradely labelled neurons were  
10 examined, far fewer were labelled with AAV2retro.GFP relative to the overall population of  
11 traced neurons (Figure 1 – figure supplement 3 and table 1). However, when the retrogradely  
12 labelled TPH2+ neurons were divided into separate areas, it was apparent that a lower  
13 percentage of neurons in the medial serotonergic nuclei including the NRM were labelled  
14 with eGFP compared to the LPGi, whereas the proportion of serotonergic neurons in the  
15 LPGi labelled with AAV2retro, CTb, and both AAV2retro and CTb were similar to the general  
16 population of retrogradely labelled hindbrain neurons (Figure 1 - figure supplement 3A and  
17 B). Therefore, we conclude that the reduced labelling of hindbrain serotonergic neurons with  
18 AAV2retro was due to a resistance of midline serotonergic neurons to AAV2retro-mediated  
19 transduction. In contrast, laterally located serotonergic neurons were more amenable to  
20 retrograde transduction with AAV2retro. A summary of these data can be found in table 1.

21 *Serotonergic hindbrain neurons are rarely infected using transsynaptic rabies tracing from*  
22 *the dorsal horn*

23 Since many serotonergic neurons were largely resistant to AAV2retro transduction, we  
24 considered that these may be resistant to other viruses used for retrograde and neuronal  
25 circuit tracing. Transsynaptic rabies tracing is a commonly used technique for tracing  
26 neuronal circuits from genetically defined populations of neurons and provides useful

1 information regarding the presynaptic inputs to a neuronal population. [69]. However, in the  
2 case of serotonergic neurons, the results of previous studies have demonstrated that very  
3 few neurons of the hindbrain are traced from dorsal horn starter populations, despite the  
4 dense serotonergic innervation of the superficial dorsal horn and the important role of  
5 serotonin in pain modulation [25; 43]. This suggests that serotonergic neurons are either  
6 traced with only limited efficacy, or that there is highly specific serotonergic innervation of  
7 some spinal neuron populations but not others.

8 To test whether serotonergic hindbrain neurons are susceptible to rabies virus infection, we  
9 injected a rabies virus, whose genome lacked the glycoprotein-encoding sequence but was  
10 pseudotyped with the SAD glycoprotein (SAD.Rabies $\Delta$ G-eGFP (SAD-G)), into the spinal  
11 dorsal horn (Figure 1 - figure supplement 4A). This virus can directly infect most neurons but  
12 cannot be propagated beyond the initially infected neurons due to the lack of the rabies  
13 glycoprotein required for transsynaptic spread [2; 68]. Five days after injection of  
14 SAD.rab $\Delta$ G-eGFP (SAD-G), 44% of the labelled hindbrain neurons contained detectable  
15 TPH2 immunoreactivity (Figure 1 – figure supplement 4B and C). Notably, the percentage of  
16 labeled neurons dropped to only 12% of labelled hindbrain neurons at day 7 post injection  
17 (Figure 1 – figure supplement 4C). This reduction may be a result of rabies virus toxicity,  
18 which could lead to a downregulation of cytoplasmic enzymes such as TPH2 to undetectable  
19 levels, and hence an underestimation of labelled serotonergic neurons. For this reason, we  
20 used a 5-day survival time for all subsequent experiments involving rabies viruses.

21 To determine whether serotonergic hindbrain neurons could be traced transsynaptically from  
22 the spinal dorsal horn, we used Hoxb8-Cre mice to define a broad starter population of spinal  
23 cord neurons. During development, Hoxb8-Cre is expressed transiently in almost all spinal  
24 neurons and astrocytes caudal to C4. It can be used to define a starter population that  
25 includes virtually all dorsal horn neurons [70]. We used Hoxb8-Cre; ROSA<sup>TVA</sup> mice to induce  
26 stable expression of TVA in most dorsal horn neurons during development, enabling their

1 infection in the adult with EnvA pseudotyped rabies viruses (SAD.Rabies $\Delta$ G-GFP (EnvA)).  
2 To allow transsynaptic spread from the starter population, a helper virus containing mCherry  
3 and rabies glycoprotein was injected two weeks prior to injection of SAD.Rabies $\Delta$ G-GFP  
4 (EnvA) (Figure 1– figure supplement 4D).

5 Five days after rabies virus injection, neurons in the ventral hindbrain labelled with eGFP  
6 were assessed for TPH2 expression by immunostaining. On average, the number of eGFP-  
7 labelled hindbrain neurons counted per animal was similar between direct and transsynaptic  
8 tracing from the spinal cord (8.3 and 8.25 respectively), both of which had far lower labelling  
9 efficiency when compared to labelling with either CTb or AAV2retro labelling. We only  
10 observed coexpression of eGFP and TPH2 once in a total of 33 inspected neurons,  
11 corresponding to 3% of our total sample (Figure 1 – figure supplement 4E and F). A  
12 summary of all rabies virus tracing experiments can be found in table 2. In the hindbrain, we  
13 never observed colocalization of mCherry and eGFP, suggesting that all eGFP-expressing  
14 neurons in the hindbrain were transsynaptically traced from the dorsal horn. Together these  
15 data demonstrate that although TPH2-expressing hindbrain neurons can be directly infected  
16 with modified rabies viruses, they are largely underrepresented with transsynaptic tracing  
17 from the dorsal horn. This may partly explain their absence from many of the circuit tracing  
18 studies that have used this approach.

19

20 *Descending serotonergic projection neurons of the LPGi can be preferentially labelled using*  
21 *AAV2retro vectors and TPH2::Cre mouse line*

22 In order to study descending serotonergic neurons functionally, we must first identify a  
23 suitable method to specifically influence those neurons. TPH2-containing neurons of the  
24 LPGi were susceptible to retrograde transduction by AAV2retro in contrast to other  
25 serotonergic nuclei of the hindbrain (Figure 2), which would permit selective transduction of

1 these neurons using AAV2retro. Further, mouse lines expressing Cre recombinase within  
2 defined neuronal populations have been widely and successfully used to functionally study a  
3 variety of spinal neuron subtypes [24; 29; 36; 51]. We therefore assessed the reliability of the  
4 TPH2::Cre mouse line as a marker of serotonergic neurons and a potential tool to gain  
5 genetic access to these cells. To determine whether the Cre expression in this mouse line  
6 was specific to serotonergic neurons that project to the spinal cord, we injected the lumbar  
7 dorsal horn of TPH2::Cre mice with an AAV2retro serotype vector containing a Cre-  
8 dependent eGFP construct (Figure 2A). This resulted in TPH2-expressing neurons of the  
9 hindbrain being labelled with eGFP, particularly in the LPGi (Figure 2B). In addition, many  
10 neurons were labelled in the ipsilateral DRG (Figure 2C). We observed a similar pattern in  
11 cell location as in the AAV2retro.eGFP labelling experiments (Figure 1C), with 72% of eGFP  
12 neurons being present bilaterally in the LPGi (Figure 2D and table 3). Furthermore, 77.5% of  
13 all neurons labelled with AAV2retro.flex.eGFP contained detectable levels of TPH2 (Figure  
14 2E and table 3). Therefore, among the hindbrain neurons that project to the spinal dorsal  
15 horn TPH2::Cre is expressed specifically in serotonergic neurons, but may also be  
16 expressed in other neurons of the nervous system, including a subset of DRG neurons.

17 To specifically manipulate spinally-projecting serotonergic neurons without influencing other  
18 neuronal populations, such as those in the DRG, we used an intersectional strategy to  
19 induce reporter expression in spinally-projecting TPH2::Cre neurons of the hindbrain (Figure  
20 2F). This strategy utilized AAV2retro serotype vectors containing a Cre-dependent optimized  
21 flippase (FLPo), which, when injected intraspinally, results in FLPo expression in Cre-  
22 expressing neurons that project to the dorsal horn. The AAV2retro serotype would also  
23 enable expression restricted to laterally located serotonin-expressing neurons. This construct  
24 also contained the coding sequence for mCherry, allowing these transduced cells to be  
25 visualized (AAV2retro.flex.FLPo.mCherry). The hindbrain was injected one week later with  
26 an AAV containing a flippase-dependent eGFP viral vector (AAV9.FRT.eGFP), to capture the  
27 neurons that were transduced from the spinal cord with AAV2retro (Figure 2F and G). This

1 approach enables the quantification of intersectionally labelled serotonergic neurons  
2 (mCherry- and eGFP-expressing), relative to the population of neurons directly labelled from  
3 the spinal dorsal horn (mCherry-expressing). Therefore, the accuracy of the hindbrain  
4 injections and the proportion of the descending projection neurons captured within the  
5 injection site could be determined.

6 Different brain injection coordinates were tested to optimize the proportion of spinally-  
7 projecting TPH2::Cre neurons that were captured with the stereotaxic brain injection.

8 Bilateral injections of AAV9.FRT.eGFP (-6,  $\pm$ 0.5, -5.9 relative to Bregma) was the most  
9 efficient in terms of mCherry+eGFP+ neurons labelled in the hindbrain (Figure 2F, G, and H).

10 With this approach, we labelled 80.6% of all retrogradely transduced neurons with eGFP with  
11 the remaining 19.4% containing mCherry only, indicating that most retrogradely transduced  
12 neurons are labelled using this strategy (Figure 2H and table 4). Additionally, this proportion  
13 was similar between the different areas containing retrogradely-labelled serotonergic  
14 neurons (LPGi = 80.6%, Medial = 78.3%, other = 82.4%, labelled neurons containing eGFP),  
15 suggesting these injection sites encompass most regions that contain AAV2retro-labelled  
16 serotonergic projection neurons. Some cells only expressed eGFP without detectable  
17 mCherry staining, either due to non-specific recombination of the FRT sites or low to  
18 undetectable levels of mCherry present in these neurons. We found that a smaller proportion  
19 of eGFP-only neurons were present in the LPGi compared to the medial serotonergic nuclei  
20 (4.6% versus 16.9% respectively, Figure 2H and table 4). We concluded that this  
21 intersectional strategy is suitable for the specific manipulation of serotonergic hindbrain  
22 neurons that project to the spinal dorsal horn, and that the majority of these traced cells are  
23 located in the LPGi.

24 *Lateral and midline serotonergic hindbrain neurons display anatomical differences in their*  
25 *spinal cord innervation*

1 Previous anterograde tracing studies have suggested that within the RVM, the innervation of  
2 the superficial dorsal horn originates from the lateral hindbrain, whereas the deeper dorsal  
3 horn is innervated by the medial hindbrain [30]. The preferential labelling of lateral  
4 serotonergic neurons using our intersectional strategy provided us an opportunity to compare  
5 the projection patterns of different serotonergic neurons of the hindbrain.

6 To assess the serotonergic innervation of the spinal cord that originates from the medial  
7 RVM we injected AAVs containing Cre-dependent reporters into the NRM of TPH2::Cre mice  
8 (Coordinates from Bregma = -6, 0, 5.9) Figure 3A) and were able to label midline  
9 serotonergic neurons with eGFP without transduction of the LPGi neurons (Figure 3B). In  
10 addition to the NRM, neighboring midline regions were also labelled, such as the raphe  
11 obscuris (ROb) and raphe pallidus (RPa) [19]. Most eGFP-labelled neurons in the injection  
12 site contained a detectable level of TPH2 (80.5%), indicating this strategy can be used to  
13 label the serotonergic midline neurons of the hindbrain (Figure 3C).

14 We used tdTomato-expressing vectors to visualize the axon termination pattern of  
15 descending serotonergic projections in the spinal cord (Figure 3D and F). For preferential  
16 labelling of the LPGi descending neurons, the lumbar spinal cord was injected with  
17 AAV2retro vectors containing a Cre-dependent optimized Flippase  
18 (AAV2retro.flex.FLPo.BFP), and one week later the hindbrain was injected with AAVs  
19 containing flippase-dependent tdTomato (AAV9.FRT.tdTOM). The stronger fluorescence of  
20 tdTomato enabled more sensitive labelling of the distal axons of descending projection  
21 neurons. The intersectional approach revealed that the densest labelling of axon terminals  
22 was present in the superficial laminae of the dorsal horn (Figure 3D, E, and H). When the  
23 spinal cords were immunostained for CGRP and PKC $\gamma$  (to delineate laminae I-IIo and III  
24 boundaries respectively), most of the labeled axons were seen within the dorsal CGRP  
25 plexus, indicating that these neurons innervate laminae I-IIo of the spinal cord (figure 3 -  
26 figure supplement 1A). Surprisingly, projections retrogradely labelled from the left lumbar

1 spinal cord contained axon collaterals that projected to both ipsilateral and contralateral  
2 dorsal horns, as well as to spinal segments caudal to the spinal injection site in the lumbar  
3 segment (Figure 3E and H). This indicates that these descending neurons have a wide-  
4 ranging axon termination pattern that extends over most of the spinal cord.

5 In contrast, axons from midline serotonergic neurons (including NRM, RO<sub>b</sub>, and RPa)  
6 directly labelled with tdTomato (from injection of AAVs containing a Cre-dependent tdTOM  
7 (AAV8.flex.tdTOM) into the NRM (-6, 0, 5.9)) were rarely present in the superficial laminae of  
8 the dorsal horn, but they densely innervated the ventral horn and were present in the deep  
9 dorsal horn (Figure 3G and I). This was confirmed by revealing the laminar boundaries with  
10 CGRP and PKC $\gamma$  staining, which indicated that the axons of these neurons was mostly  
11 present ventral to the lamina II-III border (figure 3 - figure supplement 1B) In both labeling  
12 experiments, most of the axon terminals in the spinal cord contained 5-HT, although much of  
13 the spinal 5-HT was not colocalized with tdTomato by either labeling approach (Figure 3H  
14 and I). Together this indicates that the lateral and midline serotonergic neurons in the RVM  
15 project to distinct regions of the spinal cord, in agreement with Gautier *et al* [30].

16 *Midline and lateral serotonergic hindbrain neurons have similar active and passive*  
17 *membrane properties*

18 Although much is known about the electrophysiological properties of serotonergic hindbrain  
19 neurons, to date there has not been a direct comparison of the membrane properties of  
20 those located in the NRM or LPGi. To test whether these distinct populations have similar  
21 biophysical membrane properties, TPH2::Cre neurons were labelled with tdTomato by  
22 hindbrain injection of AAV9.flex.tdTom and targeted for whole-cell recording.

23 In contrast to their anatomical differences (such as cell soma location and spinal axon  
24 termination pattern), TPH2::Cre neurons in the LPGi and NRM had similar active membrane  
25 properties and neuronal excitability (Figure 4A and B). In response to depolarizing current  
26 steps, these two groups of neurons discharged action potentials that were similar in terms of



1 their thresholds, kinetics, and firing rates (Figure 4A, B, D-G). Cells were labelled with  
2 Biocytin during recording, and these groups were distinguished based on the location of  
3 biocytin-labelled cell bodies in the hindbrain slice after recording and tissue processing  
4 (Figure 4C). Similar to previous reports on the electrophysiological properties of serotonergic  
5 RVM neurons, both groups generally had broad action potentials (measured as width at half  
6 maximal) and frequently exhibited a slow afterhyperpolarization (9/10 NRM neurons, 5/8  
7 LPGi neurons), which was similar in amplitude between groups (Figure 4A, E, and H) [73]. A  
8 summary of these electrophysiological measurements can be found in table 5.

9 *Acute activation of descending serotonergic neurons in the LPGi decreases thermal*  
10 *sensitivity*

11 Descending serotonergic projection neurons can both decrease or increase pain sensitivity,  
12 and optogenetic activation of serotonergic neurons of the nucleus raphe magnus produces  
13 long-term hypersensitivity to both mechanical and thermal sensitivity [14; 66]. However,  
14 intrathecal injection of serotonin can produce acute antinociception [64], and currently little is  
15 known of the effect of preferentially activating descending serotonergic neurons in the LPGi.

16 To clarify whether the acute activation of these serotonergic neurons is pro- or  
17 antinociceptive, we used the intersectional strategy to express the excitatory DREADD  
18 hM3D(q) in descending serotonergic neurons of the LPGi (Figure 5A). Although many  
19 neurons of the hindbrain were labelled with hM3Dq-mCherry and virtually all mCherry-  
20 expressing axon terminals in the lumbar spinal cord contained detectable 5-HT, this only  
21 corresponded to a minority of the serotonergic innervation in this area (Figure 5B and C).  
22 After injecting CNO hM3Dq-mCherry-expressing neurons increased their activity, as  
23 evidenced by an increased expression of c-Fos in their nuclei relative to vehicle injected  
24 controls (Figure 5 - figure supplement 1)

25 Despite sparse terminal labelling in the spinal cord, withdrawal latencies to thermal stimuli  
26 were increased following CNO injection (Figure 5D). Animals that had received CNO

1 injections exhibited significantly longer withdrawal thresholds to infrared heat stimulation than  
2 vehicle injected controls (Repeated measures one-way ANOVA,  $F(3, 9) = 10.55$ ,  $P <$   
3  $0.0001$ ). Similarly, response latencies to the cold plantar assay were also prolonged following  
4 CNO injection (Repeated measures one-way ANOVA,  $F(3, 9) = 7.309$ ,  $P = 0.0012$ ). In  
5 contrast, tactile sensitivity to punctate mechanical stimulation with von Frey filaments was  
6 unaltered (Repeated measures one-way ANOVA,  $F(3, 9) = 1.402$ ,  $P = 0.2666$ ) (Figure 6E).  
7 To exclude the possibility that any observed alteration in sensory stimulus-induced behavior  
8 was due to impaired motor control or sedation, we measured the latency to fall from an  
9 accelerating rotarod before and after injection of CNO or vehicle. Latency to fall was  
10 comparable between animals before and after injection indicating no deficits in sensorimotor  
11 function or the absence of sedative effects (repeated measures one-way ANOVA,  $F(3, 5) =$   
12  $0.354$ ,  $P = 0.787$ )(Figure 5D) Together, these data indicate that acute activation of  
13 descending serotonergic neurons reduces sensitivity to thermal stimuli, but does not strongly  
14 influence mechanical sensitivity.

15 The presence of axon collaterals on the contralateral side of the spinal cord raises the  
16 possibility that these could also mediate a similar effect to those on the ipsilateral side.  
17 Therefore, we also tested the contralateral paw using the same sensory tests (Figure 5 –  
18 figure supplement 2). We saw a significant increase in withdrawal latencies to heat  
19 stimulation in the Hargreaves assay (Repeated measures one-way ANOVA,  $F(3, 14) =$   
20  $7.757$ ,  $P = 0.0003$ )(Figure 5 - figure supplement 3), suggesting that the activation of these  
21 neurons has some influence on the sensitivity of the contralateral paw, presumably via axon  
22 collaterals present in the contralateral dorsal horn.

23 Sex differences are often reported in the context of sensory neurobiology, and serotonin  
24 specifically has been implicated in mediating such differences [13; 39; 48]. To see if similar  
25 differences are observed in our experiment, we divided the group into male and female  
26 animals to determine whether both sexes responded in a similar manner. We find that both

1 male and female mice show reduced sensitivity to thermal stimuli, and both show unaltered  
2 mechanical sensitivity (Figure 5 - figure supplement 3).

3 In addition, CNO has been reported to mediate effects independently of hM3Dq expression  
4 [31]. To exclude that the effects seen in our assays were caused by such off-target effects,  
5 we performed the same sensory and motor tests on animals that did not express hM3Dq. In  
6 our hands, the injection of CNO did not produce any noticeable change in any of the  
7 behavioral tests in the absence of hM3Dq expression (Figure 5 - figure supplement 4).

8 When we examined the hindbrain tissues from animals used in the LPGi activation  
9 experiments, we quantified the proportion of retrogradely labelled and intersectionally  
10 labelled neurons. On average, 67% of BFP-labelled neurons were also labeled with hM3Dq-  
11 mCherry, and very few (1.85%) only expressed mCherry (figure 5 - figure supplement 5).  
12 This shows that the intersectional strategy employed for chemogenetic activation of  
13 descending serotonergic neurons is similarly specific as our previous labelling experiments  
14 (figure 2F, G, and H)

15

16 *Acute activation of serotonergic neurons in the medial RVM increases mechanical sensitivity*

17 Activation of serotonergic neurons has also been associated with increased sensitivity to  
18 tactile and thermal stimuli and is thought to underly certain forms of neuropathic pain [14;  
19 59]. The differences between our findings and those of Cai *et al* [14] could be due to either of  
20 the mode/strength of neuronal activation (chemogenetic vs optogenetic) or the anatomical  
21 location of the activated neurons (medial hindbrain vs lateral hindbrain). To test this directly,  
22 we used the same chemogenetic receptor as our previous experiments to activate midline  
23 serotonergic neurons (Figure 6A). Using the same strategy as the anatomical tracing  
24 experiment (Figure 3A), we injected AAVs containing Cre-dependent hM3Dq.mCherry into  
25 the NRM. Similarly, we were able to limit transgene expression to the medial serotonergic

1 neurons including the NRM, the ROb and RPa, but without spread to the LPGi (Figure 6B  
2 and figure 6 – figure supplement 1). This resulted in the presence of mCherry-labelled  
3 terminals in the deep dorsal horn of the spinal cord, with limited expression in the dense  
4 plexus of 5-HT terminals in the superficial spinal laminae (Figure 6C).

5 In contrast to the activation of serotonergic neurons within the LPGi, the activation of medial  
6 RVM neurons had no effect on thermal withdrawal latencies (Repeated measures one-way  
7 ANOVA,  $F(3, 6) = 0.531$ ,  $P = 0.667$ ) or responses to cooling (Repeated measures one-way  
8 ANOVA,  $F(3, 6) = 3.071$ ,  $P = 0.054$ ) (Figure 6D). However, we observed a significant  
9 decrease in the withdrawal thresholds to punctate mechanical stimuli in the hindpaw  
10 (Repeated measures one-way ANOVA,  $F(3, 6) = 13.84$ ,  $P = 0.787$ )(Figure 6D). Again,  
11 neither CNO nor vehicle injection impaired sensorimotor coordination or induced sedation,  
12 using latency to fall from an accelerating rotarod as a readout measure (Repeated measures  
13 one-way ANOVA,  $F(3, 6) = 1.791$ ,  $P = 0.185$ ) (Figure 6D). These data indicate that, in  
14 contrast to serotonergic neurons of the LPGi, activating medial serotonergic hindbrain  
15 neurons increases mechanical sensitivity without influencing responses to thermal stimuli.

16 To test for potential sex differences in mechanical hypersensitivity, we again divided our  
17 group into males and females and compared the withdrawal thresholds/latencies post-vehicle  
18 injection to post-CNO injection. We see that both male and female animals exhibit similar  
19 increases in mechanical sensitivity after CNO injection (figure 6 - figure supplement 2),  
20 suggesting that this effect is not sex specific. The withdrawal latencies to heat and cold were  
21 unchanged and the latency to fall from the accelerating rotarod were similarly unchanged in  
22 both male and female animals.

23 Additionally, when we inspected the injection sites in the brain stem from animals used in  
24 these behavioral experiments, we found that a similar proportion of neurons expressed TPH2  
25 (85.1%, figure 6 - figure supplement 3) as compared to our previous labelling experiments

1 (figure 3C). Therefore, we concluded that the chemogenetic activation is largely restricted to  
2 serotonergic neurons of the medial hindbrain in these experiments.

### 3 **Discussion**

#### 4 *Anatomical organization of descending serotonergic innervation of the lumbar spinal cord*

5 The anatomical locations of serotonergic nuclei in the brainstem have been known since the  
6 early studies of Dahlstrom and Fuxe [19]. These areas have later been shown to contain  
7 spinally-projecting neurons and together provide the spinal cord with serotonin [41]. Similarly,  
8 we were also able to label the same regions from the spinal cord with CTb tracing (Figure 1 -  
9 figure supplement 2). However, we found that most of the descending serotonergic neurons  
10 transducible with AAV2retro serotype vectors from the mouse spinal cord are located in the  
11 LPGi, similar to what has been previously demonstrated [65]. We used this selectivity to  
12 devise a strategy to preferentially label midline or lateral serotonergic neurons and  
13 demonstrate that, in agreement with anterograde tracing studies, the innervation of the  
14 superficial laminae of the dorsal horn mainly originates from the LPGi and not the NRM [30].  
15 Unlike Gautier et al [30], we found many axon terminals present within the ventral horn as  
16 well as the deep dorsal horn. Potentially this reflects a species difference (rat versus mouse),  
17 or the labelling of other midline serotonergic regions beyond the NRM, such as the ROb or  
18 the RPa in the present study [34; 49]. However, inclusion of these midline serotonergic  
19 neurons within the injection site demonstrates that they do not project to the superficial  
20 dorsal laminae. Therefore, it is likely that these pathways influence anatomically distinct  
21 neuron populations of the spinal cord, and likely play different functional roles.

22 The spinal dorsal horn is organized in a laminar structure that is closely linked to its function,  
23 such that thermal and nociceptive information is generally received and processed in the  
24 superficial laminae, whereas non-nociceptive mechanical and proprioceptive information is  
25 processed in deeper spinal laminae [61]. This laminar organization can be seen in terms of  
26 gene expression [33], the termination zones of different primary sensory neurons [17; 42],

1 and the restricted laminar location of neuron populations [20]. Therefore, the laminar  
2 location of serotonin release will mostly influence different populations of neurons within  
3 these regions, which play diverse functional roles [3; 23; 24; 29].

#### 4 *Antinociceptive function of descending LPGi serotonergic neurons in spinal circuits*

5 Acute activation of spinally-projecting serotonergic neurons using excitatory DREADDs was  
6 able to reduce sensitivity to thermal tests (Figure 5D). In support of this idea, the axons of  
7 these projections are densest in the superficial laminae of the spinal cord (Figure 3E and H),  
8 where temperature-related information is conveyed by TRPV1- and TRPM8-expressing  
9 sensory neurons [16; 17; 22]. The presence of axons from lateral serotonergic neurons within  
10 the region that receives, and processes thermal information is consistent with the  
11 observation that activating these neurons affects thermal sensitivity. Furthermore, 5-HT can  
12 inhibit C fiber-mediated input to the rat superficial dorsal horn and hyperpolarize many types  
13 of excitatory neurons in this area, in agreement with a reduction in neuronal activity that  
14 would inhibit the relay of temperature-related information [44].

#### 15 *Pronociceptive function of medial serotonergic neurons in spinal circuits*

16 Preclinical models of chronic pain can increase the activity of serotonergic hindbrain  
17 neurons, and TPH2 knockdown experiments can transiently reduce spinal 5-HT and  
18 hypersensitivity in neuropathic animals [59; 66]. In these neuropathic models, several  
19 changes in the physiology of the dorsal horn are widely reported [18; 62; 67]. Together, these  
20 pathological changes may alter the way that 5-HT influences the processing of sensory  
21 information within the dorsal horn. In agreement, the spinal serotonin receptors engaged by  
22 endogenous pain control systems such as diffuse noxious inhibitory controls are altered  
23 during the development of chronic pain [4-6]. Additionally, alterations could also occur within  
24 the serotonergic projection neurons, such as their activity and neurotransmitter  
25 content/concentration [63].

1 However, there are also data that point to a pro-nociceptive role for 5-HT at the spinal level in  
2 naïve animals. For example, it was shown that optogenetic stimulation of the NRM of TPH2-  
3 ChR2 animals could induce hypersensitivity that lasted several weeks [14]. In our  
4 chemogenetic experiments, the activation of NRM neurons with CNO did produce an  
5 increase in mechanical sensitivity, but unlike Cai *et al* [14] we did not see an alteration in  
6 thermal sensitivity or an effect that outlasted the neuron stimulation. These differences could  
7 be explained in part by the intensity and location of the stimulation used in experiments. In  
8 support of this idea, activation of the same neuron population with optogenetic or  
9 chemogenetic tools can produce distinct behaviors, likely due to differences in the strength or  
10 pattern of the neuronal activation [58].

11 The activation of the midline serotonergic neurons influences multiple functionally different  
12 groups of neurons within the injection site, including the NRM, ROb, and RPa [49]. These  
13 more caudal nuclei are known to affect the motor system and respiratory functions [12; 34;  
14 37]. Within the sensory assays tested, there was a rather selective change in mechanical  
15 responses and unaltered thermal responses, indicating that the effect was modality selective  
16 and unlikely due to motor effects alone. However, it cannot be excluded that serotonergic  
17 neurons in these distinct midline regions contribute to the reduced mechanical thresholds,  
18 either indirectly or by direct altering motor neuron activity in the ventral horn [21; 34; 40].  
19 Further studies of sensory function utilizing intersectional strategies to precisely capture and  
20 manipulate the midline populations will help to validate the present findings [49].

21 Together the results of the chemogenetic experiments indicate that the same transmitter  
22 released into different spinal laminae can produce opposing effects on spinal nociception.  
23 Potential explanations for these findings include the 5-HTR subtypes that are engaged, the  
24 spinal neuron populations that are modulated, or a combination of both. Some 5-HTRs are  
25 known to have an excitatory influence when activated, whereas others have an inhibitory  
26 effect upon ligand binding [1; 7; 44]. The activation of excitatory neurons and the inhibition of

1 inhibitory neurons in the deep dorsal horn, corresponding to the termination zone of the  
2 medial serotonergic neurons, are known increase mechanical sensitivity [23; 24; 51; 52].  
3 Conversely, the activation of inhibitory neurons in the superficial dorsal horn, the region  
4 innervated by the lateral serotonergic neurons, and the inhibition of nociceptors through  
5 presynaptic inhibition of their central terminals could promote thermal hyposensitivity [38; 44;  
6 71]. Further studies are required to elucidate precisely which spinal 5-HT receptors and  
7 neuronal elements are mediating these opposing sensory phenomena.

8 Given the previously reported heterogeneity in biophysical properties of serotonergic neurons  
9 [49], we found surprisingly little difference in the passive and active membrane properties  
10 between NRM and LPGi serotonergic neurons (table 5 and figure 4). Additionally, none of the  
11 recorded neurons displayed spontaneous activity, which has been reported previously for  
12 serotonergic projection neurons of the hindbrain [73]. This may be attributable to differences  
13 in recording conditions, such as recording temperature, animal species, and recording  
14 solution composition. Additionally, these groups of neurons may exhibit differences in  
15 electrophysiological properties, such as chemosensitivity, spontaneous activity, and  
16 responses to nociceptive stimuli, that are only detected in *in vivo* preparations or under  
17 recording conditions that differ from the present study [27; 28; 34; 45; 55; 56].

### 18 *Limitations of transsynaptic rabies tracing of serotonergic RVM neurons*

19 Transsynaptic rabies tracing has been widely used in recent years to identify presynaptic  
20 inputs to genetically defined neuronal populations and has become a frequently used tool for  
21 the study of neuronal circuits. Functional studies are limited due to the toxicity of first  
22 generation  $\Delta G$  rabies viruses. However, other limitations of this technique are known, such  
23 as the resistance of some neuron types to infection by modified rabies viruses [2]. It is  
24 possible that some types of hindbrain neurons are completely resistant to infection with  
25 modified rabies viruses, although this is not the case for serotonergic neurons, as they can  
26 be infected via their axon terminals (figure 1- figure supplement 4A-C). We show that



1 although descending TPH2-expressing neurons are not resistant to infection from G-protein  
2 deficient rabies viruses, they are rarely traced transsynaptically from dorsal horn neurons  
3 (figure 1 - figure supplement 4). The lack of transsynaptic labelling from the dorsal horn is  
4 possibly due to the synaptic organization of serotonergic axons at this site, since serotonin is  
5 known to mainly act via volume transmission [57]. Since similar numbers of hindbrain  
6 neurons were labelled using direct rabies infection and transsynaptic rabies labelling, this  
7 could indicate an increased labelling efficiency of other neurons with the latter approach.  
8 Potentially this could be related to the synaptic density from these neurons to the starter  
9 population. However, both direct and transsynaptic rabies labelling were far less sensitive  
10 than the CTb or AAV2retro tracing, making interpretation of these findings complicated due  
11 to the comparatively small sample sizes.

12 Most serotonergic axons in the rat dorsal horn do not form synaptic contacts [46; 57].  
13 However, some 5-HT-containing axonal boutons do form synapses within the dorsal horn,  
14 and these are observed as symmetrical synapses [53]. Since projection neurons are  
15 approximately 5% of all lamina I neurons [15], the transsynaptic tracing from these neurons  
16 may not be detected in our experiments. Additionally, transsynaptic tracing from a primary  
17 afferent starter population was used to label serotonergic hindbrain neurons, suggesting axo-  
18 axonic synapses between descending serotonergic neurons and their central terminals [75].  
19 In the present study, the number of primary afferent neurons transduced from intraspinal  
20 injection of helper virus is likely small, since the AAV8 serotype and the inclusion of the hSyn  
21 promoter were used to reduce the transduction of sensory neurons [32]. This is consistent  
22 with the low number of mCherry-expressing cells found in the DRG taken from these  
23 animals. Taken together, these may explain why so few serotonergic hindbrain neurons were  
24 traced transsynaptically from the spinal dorsal horn [25; 43].

25 *Preferential transduction of LPGi serotonergic neurons with AAV2retro serotype vectors*

1 The AAV2retro serotype has been developed for the retrograde delivery of genetic material  
2 to projection neurons via their axon terminals in a target region [60]. Many projection neurons  
3 are found to display some resistance to transduction with these tools, for example  
4 dopaminergic neurons that project from the substantia nigra to the striatum and descending  
5 noradrenergic neurons of the locus coeruleus to the spinal cord [26; 60]. Like others, we also  
6 find that midline neurons including the NRM serotonergic neurons are less sensitive to  
7 AAV2retro-mediated transduction [65]. Surprisingly, we observed that the serotonergic  
8 neurons of the lateral hindbrain do not display such resistance (Figure 1). This would suggest  
9 that these neurons are different in some property that allows the AAV2retro to enter their  
10 terminals or enhances the retrograde transport of the viral payload. The increased retrograde  
11 labelling efficiency of AAV2retro is not fully understood, although enhanced entry into axon  
12 terminals by increased spread of the vector in the injection site, entry into neurons via novel  
13 cell surface receptor interactions, and vesicular trafficking have been suggested [60].  
14 AAV2retro-resistant neurons commonly use monoamines as neurotransmitters, suggesting  
15 that they likely share common features protecting them from transduction by these vectors.  
  
16 Primarily, our data demonstrate that serotonergic neurons of the lateral hindbrain are  
17 antinociceptive when activated. These neurons project their axons to the superficial laminae  
18 of the dorsal horn and can be targeted using AAV2retro vectors. In contrast, the medial  
19 serotonergic neurons are largely resistant to AAV2retro-mediated transduction, produce  
20 mechanical hypersensitivity upon acute activation, and project their axons to the deeper  
21 dorsal horn. Secondly, we highlight some of the limitations and challenges associated with  
22 AAV2retro-mediated and rabies virus-based transsynaptic tracing from the spinal dorsal  
23 horn. These limitations are likely to have broader implications for transsynaptic rabies-based  
24 circuit tracing and the targeting of other projections that use biogenic amines, and possibly  
25 other transmitter systems.

## 1 **Materials and Methods**

### 2 *Animals*

3 Mice of either sex aged between 6-12 weeks were used for experiments. Permission to  
4 perform these experiments was obtained from the Veterinäramt des Kantons Zürich  
5 (154/2018 and 063/2016). The various transgenic mouse lines used in this study are listed in  
6 table 6. TPH2::cre and HoxB8::cre mice are both BAC transgenic lines, and the ROSA<sup>TVA</sup> is a  
7 knockin reporter line.

### 8 *Surgeries*

9 The dorsal horn of the lumbar spinal cord was injected in a similar manner to previous  
10 studies [26; 32]. Briefly, anesthesia of mice was induced with 5% Isoflurane in an induction  
11 chamber. Mice were then transferred to a stereotaxic injection setup and anesthesia was  
12 maintained with 1-3% Isoflurane delivered through a face mask. Body temperature was  
13 maintained using a heated mat placed beneath the animal. Vitamin A cream was applied to  
14 the eyes to prevent corneal drying during the operation and buprenorphine (0.1-0.2 mg/kg)  
15 was injected subcutaneously prior to the operation. The back of the animal was shaved, and  
16 the skin was scrubbed with Betadine solution. Once dried, a midline incision was made  
17 above the vertebral column to expose the T13 vertebra, which was clamped using a pair of  
18 spinal adaptors to isolate movements from the animal's breathing. This vertebra was  
19 selected since it is directly above the lumbar L3 spinal cord, which corresponds to the spinal  
20 cord segment receiving innervation from the hindlimbs [32]. A borehole was made in the  
21 center of the left-hand side of the clamped vertebra and viruses, and/or 1% cholera toxin b  
22 (CTb) were injected into the dorsal horn at a depth of 300  $\mu$ m below the spinal surface  
23 approximately 500  $\mu$ m left of the central artery. For most injections, 3 x 300 nl virus solution  
24 was injected along the rostrocaudal extent of the spinal cord at an infusion rate of 50 nl/min.  
25 For transsynaptic tracing experiments, the rabies virus was injected 2 x 500 nl at either side

1 of the T13 vertebra in the same region as the injection of helper virus, which was injected two  
2 weeks previously. For a list of the retrograde tracers and viruses used in this study, please  
3 refer to table 7

4 For injections into the hindbrain, animals were prepared for surgery in a similar manner to the  
5 spinal cord injections. The head was fixed in position using ear bars mounted on the  
6 stereotaxic frame (Kopf instruments). Coordinates were chosen based on the hindbrain  
7 location of the TPH2::Cre neurons retrogradely labelled from the spinal cord with reference to  
8 a mouse brain atlas (-6, +/-0.5, 5.9, 1  $\mu$ l per injection site, infusion rate 50 nl/min). All  
9 coordinates are given as rostrocaudal, mediolateral, and dorsoventral (x, y, z) relative to  
10 Bregma. Injections into the midline nucleus raphe magnus were made at coordinates -6, 0,  
11 5.9 and a volume of 300nl was chosen to limit the transgene expression to the medial  
12 serotonergic neurons. The movement of the frame was achieved using motorized axes  
13 controlled by a computer interface, which was also used to select the injection target  
14 (Neurostar). This same software was used to adjust the injection target for tilt and scaling, by  
15 adjusting the mouse brain atlas relative to four points on the surface of the skull (Bregma,  
16 Lambda, 2 mm to the right of the midline, and 2 mm to the left of the midline).

### 17 *General features of tissue preparation and immunohistochemistry*

18 Animals were perfusion fixed with freshly depolymerized 4% paraformaldehyde (room  
19 temperature, dissolved in 0.1 M PB, adjusted to pH 7.4) following a brief rinse of the mouse  
20 circulatory system with 0.1 M PB. Nervous tissues were quickly dissected and post-fixed in  
21 the same fixative for two hours at 4°C. After post-fixation, tissues were rinsed 3 times with  
22 0.1 M PB and placed in 30% sucrose solution (w/v dissolved in 0.1 M PB) for 24-72 hours for  
23 cryoprotection. Tissues were rinsed with 0.1 M PB before being embedded in NEG-50  
24 mounting medium and were either cut at 60  $\mu$ m on a sliding blade microtome (Hyrax KS 34,  
25 histocam AG) and stored as free-floating sections, or were cut at 30  $\mu$ m using a cryostat

1 (Hyrax 60, histocam AG) and were mounted directly onto microscope slides (Superfrost Plus,  
2 ThermoScientific).

3 Free floating sections were processed immediately for tissue staining or were stored in  
4 antifreeze medium (50 mM sodium phosphate buffer, 30% ethylene glycol, 15% glucose, and  
5 sodium azide (200 mg/L) at -20°C until required. Antifreeze medium was removed by rinsing  
6 sections three times in 0.1 M PB before further processing. Sections were rinsed in 50%  
7 ethanol for 30 minutes at room temperature, followed by three rinses in PBS + 8g/L NaCl  
8 Alternatively, slides were prepared by mounting frozen sections directly onto superfrost  
9 slides. These were either used immediately for immunostaining or stored at -80°C until  
10 further use. Before immunostaining, excess NEG50 freezing medium was removed by  
11 rinsing in 0.1 M PB for one hour at room temperature. A hydrophobic barrier was drawn  
12 around the sections using a fat pen, and immunoreactions were performed on the slides.

13 All primary antibodies and dilutions used in this study are included in table 8. Primary  
14 antibodies were diluted in a PBS + 8g/L NaCl, 0.3% v/v Triton-X, and 10% v/v normal donkey  
15 serum. Secondary antibodies were diluted in a similar solution, but without the 10% normal  
16 donkey serum (Table 8). Sections or slides were incubated in primary antibodies for 24 – 72  
17 hours at 4°C, and these were revealed by incubation in secondary antibodies overnight at  
18 4°C. Following immunostaining, sections or slides were rinsed three times for 10 minutes  
19 each in PBS + 8g/L NaCl before being mounted in Dako anti-fade medium.

#### 20 *Rabies virus tracing experiments*

21 Rabies virus tracing experiments used either the SAD-G pseudotyped or EnvA pseudotyped  
22 RabΔG-GFP viruses, which are deficient in the SAD-glycoprotein required for transsynaptic  
23 spread and contain eGFP for identification of infected cells [68; 69]. Rabies viruses  
24 pseudotyped with the SAD-G glycoprotein can directly infect most, but not all, types of  
25 neurons [2; 68]. The rabies viruses that are pseudotyped with the EnvA glycoprotein are only

1 able to infect cells through binding to the TVA receptor. Therefore, the restricted expression  
2 of the TVA receptor to certain cell types allows the selective infection of those neurons with  
3 EnvA pseudotyped rabies viruses [69]. For transsynaptic tracing experiments, the helper  
4 virus containing the rabies glycoprotein was injected two weeks prior to rabies virus injection  
5 to enable transsynaptic spread.

6 Animals were perfused 5 or 7 days after dorsal horn injection of rabies viruses. Hindbrain  
7 sections from rabies virus injected tissue were cut at 30  $\mu\text{m}$  and mounted directly onto  
8 microscope slides. Tissues were immunostained for eGFP and TPH2 to determine the  
9 proportion of labelled hindbrain neurons that contained detectable TPH2.

#### 10 *Image acquisition and analysis*

11 For quantification of retrogradely labelled cells in the hindbrain, image stacks were acquired  
12 at 5  $\mu\text{m}$  z-spacing using a Zeiss lsm 800 confocal microscope with Zen blue software.  
13 Confocal scans were made using 488, 561 and 640 nm lasers and the pinhole was set to 1  
14 Airy Unit for reliable optical sectioning. Care was taken to acquire image stacks up to a depth  
15 where there was clear immunoreactivity of all antigens to avoid false negatives during  
16 quantification due to antibody penetration. Within each experiment, all acquisition settings  
17 were kept constant, and images were analyzed with FIJI using the cell counter plugin.

18 Alternatively, an automated cell quantification pipeline was designed in CellProfiler to count  
19 retrogradely labelled neurons in the RVM. We noticed that many large neurons within the  
20 RVM contained NeuN immunoreactivity that was present in more than one image in the  
21 image stacks (5  $\mu\text{m}$  z-spacing). Automated counting of all images within each z-stack would  
22 lead to double counting a large proportion of cells present on multiple images within the  
23 image stack. However, if only one image was analyzed per image stack, numerous cells  
24 would be excluded from the analysis. Therefore, the acquired z-stacks were processed into  
25 either one to two orthogonal projections from 2 images to reduce the double counting of cells

1 whilst ensuring the counting of most visible cells within each stack. One sample projection  
2 was then counted manually using the cell counter plugin of ImageJ, to serve as a guide in the  
3 development of the CellProfiler pipeline. All orthogonal projections were processed using the  
4 same CellProfiler pipeline with set parameters to ensure consistent data collection.

5 The images were loaded into this CellProfiler pipeline and the three channels (CTb, eGFP  
6 and NeuN) were separated from each other. NeuN- and CTb-stained neurons were identified  
7 as primary objects using the two-class Otsu method as a global thresholding strategy, whilst  
8 eGFP-containing objects were identified using the adaptive thresholding strategy (with an  
9 adaptive window of 50 pixels). NeuN stained cells were distinguished from the background  
10 based on their intensity, whereas the method used for detecting CTb and eGFP positive cells  
11 was based on their shape. The NeuN objects were converted into a binary (black & white)  
12 image and the coexpression of eGFP or CTb was assessed. The object counts of  
13 eGFP/NeuN, CTb/NeuN, eGFP/CTb/NeuN and NeuN positive objects were then extracted  
14 and exported to a spreadsheet.

15 To determine whether serotonergic neurons were labelled using modified rabies virus  
16 tracing, eGFP labelled neurons in the hindbrain were identified and immunostained against  
17 TPH2. These were scanned on a Zeiss 710 LSM confocal microscope, either as a short  
18 stack through the cell body, or as a single optical section through the center of the neuron.  
19 Scan settings were determined by the fluorescent intensity of the surrounding TPH2  
20 immunoreactive regions in the nucleus raphe magnus (NRM) and lateral  
21 paragigantocellularis (LPGi) and were kept consistent for all experiments. Cell identities were  
22 catalogued and TPH2 immunoreactivity was determined for all sampled cells.

### 23 *Slice preparation and electrophysiology*

24 Hindbrain slices were prepared from TPH2::Cre animals that had received a bilateral  
25 injection of AAV9.flex.tdTomato into the ventral hindbrain. Animals were aged 3-6 weeks at  
26 the time of injection and were prepared for electrophysiological recordings 1-2 weeks later.

1 Slices were prepared in a similar manner to previous studies [50; 73]. Animals were  
2 decapitated and the brain was rapidly dissected and placed in ice cold oxygenated dissection  
3 solution (containing in mM (65 NaCl, 105 sucrose, 2.5 KCl, 1.25 NaH<sub>2</sub>PO<sub>4</sub>, 25 NaHCO<sub>3</sub>, 25  
4 glucose, 0.5 CaCl<sub>2</sub>, 7 MgCl<sub>2</sub>). The hindbrain was isolated, glued to a block of 2% agarose  
5 and installed in a slicing chamber. Transverse slices of hindbrain were cut at 250 μm on a  
6 vibrating blade microtome (D.S.K microslicer DTK1000), which were allowed to recover for at  
7 least 30min in oxygenated aCSF at 34°C prior to recording, containing (in mM) 120 NaCl, 26  
8 NaHCO<sub>3</sub>, 1.25 NaH<sub>2</sub>PO<sub>4</sub>, 2.5 KCl, 5 HEPES, 14.6 glucose, 2 CaCl<sub>2</sub>, 1 MgCl<sub>2</sub>, pH 7.35 - 7.40,  
9 osmolarity 305 - 315 mOsm.

10 During recording, slices were perfused with aCSF at a flow rate of 2-3 ml/min. Targeted  
11 recordings were taken from tdTomato-expressing neurons using glass microelectrodes filled  
12 with a K-gluconate internal solution (containing 130 K-Gluconate, 5 NaCl, 1 EGTA, 10  
13 HEPES, 5 Mg-ATP, 0.5 Na-GTP, 2 biocytin). Whole-cell recordings were acquired using a  
14 HEKA EPC10 amplifier with Patchmaster software at a sampling frequency of 20 kHz (HEKA  
15 Elektronik). A biophysical characterization of passive and active membrane properties was  
16 performed in current and voltage clamp modes, and the access resistance was monitored  
17 between recordings using a 10mV voltage step protocol. Data were excluded if the access  
18 resistance changed >30% during recording.

19 The relative position of the recorded/labelled neurons in each slice was noted, and slices  
20 were fixed overnight in 4% PFA at 4°C at the end of each experiment. Slices were  
21 immunoreacted with primary antibodies against tdTOM and TPH2, which were revealed the  
22 next day with secondary antibodies conjugated to Cy3 or Alexa 647. Biocytin was revealed  
23 with Avidin-Alexa A488 and the position of the filled neurons was assigned to the NRM or the  
24 LPGi, which could be determined based on the pattern of TPH2 immunoreactivity in the slice.  
25 Cells located outside of these two regions were not analyzed further.



1 *Behavioral assays*

2 For specific DREADD-mediated activation of descending serotonergic pathways, an  
3 intersectional approach was used for labelling the lateral hindbrain neurons whereas direct  
4 labelling was used to label the medial neurons. TPH2::Cre mice received an intraspinal  
5 injection of AAV2retro.flex.FLPo.BFP, and one week later received bilateral injections into  
6 the ventral hindbrain with AAV1.FRT.hM3Dq.mCherry. Behavioral tests were performed after  
7 10 days incubation time to allow the expression of the viral transgene. Before experiments  
8 mice were acclimatized to the behavioral setup for one hour in a room maintained at 20-  
9 22°C. For the Hargreaves plantar, cold plantar, electronic von Frey, and Rotarod assays, six  
10 measurements were taken for each time point and an average of these was reported. All  
11 measurements were taken from both hindlimbs of all animals. Alternatively, serotonergic  
12 neurons in the medial hindbrain were labelled by injection of AAV8.hsyn.flex.hM3Dq into the  
13 NRM (injection coordinates -6, 0, 5.9) and the same behavioral tests were performed with the  
14 same experimental design.

15 *Hargreaves*

16 Sensitivity to heat stimuli was assessed with the Hargreaves plantar assay (IITC). Mice were  
17 placed on a pre-heated transparent platform set to a temperature of 30°C, and the  
18 withdrawal latencies were recorded using a timed infrared heat source. A resting intensity of  
19 5% and an active intensity of 20% was used for stimulations, and a maximum cutoff time of  
20 32 s was set to avoid tissue damage. On average, naïve animals will withdraw to this  
21 stimulation at temperatures between 34 - 36°C [11].

22 *Cold plantar assay*

23 Mice were placed on a 5 mm borosilicate glass platform and were stimulated from beneath  
24 with dry ice pellets. The time taken to withdraw the paw was measured using a stopclock and  
25 a maximum stimulation time of 20 s was used to avoid tissue damage. The cold plantar

1 assay generally produces a withdrawal when the temperature of the glass decreases 2°C for  
2 naïve animals [11].

### 3 *von Frey*

4 Von Frey thresholds were measured using an electronic von Frey algesiometer (IITC).  
5 Animals were adapted on a mesh surface, and the plantar surface of each paw was  
6 stimulated with a bendable plastic filament attached to a pressure sensitive probe. Pressure  
7 was applied to the plantar surface in a linear manner until the animal withdrew its paw, and  
8 the maximum pressure (the pressure at which the animal withdrew) was displayed on the  
9 device.

### 10 *Rotarod*

11 Sensorimotor coordination was evaluated using an accelerating rotarod, and the time taken  
12 for animals to fall from the rotating barrel was recorded. The barrel rotated from 4 - 40rpm  
13 over a period of 300s, and increased speed constantly throughout each experiment. Values  
14 were discarded if the animal jumped from the barrel, and if the animal jumped in >50% of  
15 trials for a given time point these data were discarded from the experiment. Two training  
16 sessions were given for all animals prior to the experiment being started to ensure a stable  
17 performance in the absence of treatment.

### 18 *Drug application*

19 For DREADD activation experiments, clozapine-N-oxide (CNO, 2 mg/kg, Enzo life sciences,  
20 product number BML-NS105-0025) or vehicle controls were injected intraperitoneally, with  
21 the experimenter being blinded to the injected substance. Animals were tested directly before  
22 and 1-3 hours following i.p. injection. Stock CNO was dissolved in DMSO at 100 mg/ml and  
23 kept at room temperature, which was diluted 1:500 in sterile filtered saline immediately prior  
24 to injection with the volume of injected substance being 10 µl/g.

1 *Experimental design and statistical tests*

2 All behavioral assays were performed twice on each animal so that they received an  
3 intraperitoneal injection of CNO on one day and Vehicle injection on the other, with the  
4 experimenter being blinded to the treatment. Response latencies and thresholds following  
5 CNO and Vehicle were compared using a repeated measures one-way ANOVA, a normal  
6 distribution was assumed for response latencies and thresholds and a Bonferroni post-hoc  
7 test was used to compare the mean withdrawal latencies and thresholds between CNO and  
8 vehicle treated groups before and 1-3 hours after injection. Statistical significance was taken  
9 as  $P < 0.05$ .

10 To compare membrane properties between medial and lateral serotonergic neurons, a  
11 normal distribution in values was assumed and an unpaired two-tailed t-test was used to test  
12 for differences.

13 *Data collection, storage, and presentation*

14 Data obtained from the quantification of images were collected and processed in Microsoft  
15 Excel and were presented using GraphPad Prism 5. All datapoints on graphs represent  
16 either a number or percentage of cells counted per animal, or as a response for each animal  
17 in behavioral assays. Representative images were produced in Affinity Photo and were  
18 annotated and arranged into figures in Affinity Designer. Raw data acquired in these  
19 experiments are uploaded to [www.datadryad.org](http://www.datadryad.org) and are available for download.

20

1 **Figure 1: Retrograde labelling of spinally-projecting serotonergic neurons with**  
2 **AAV2retro vectors and Cholera toxin b subunit.** A. Injection scheme for retrograde  
3 labelling of spinally-projecting neurons with AAV2retro.eGFP. B Image of the ventral  
4 hindbrain containing eGFP-labelled neurons (scale bar = 200  $\mu\text{m}$ ). Inset shows enlargement  
5 of the LPGi to reveal eGFP neurons that also express TPH2. C. Quantification of cell location  
6 for eGFP-labelled neurons that express TPH2, each datapoint is a count per animal (n = 3)  
7 D. Injection scheme for retrograde tracing from the spinal dorsal horn with AAV2retro.eGFP  
8 and CTb. E. Representative image of the ventral hindbrain containing CTb-labelled and  
9 AAV2retro-transduced projection neurons (scale bar = 200  $\mu\text{m}$ ). F. Anatomical locations of  
10 retrogradely labelled TPH2+ hindbrain neurons labelled with CTb or AAV2retro (n = 3  
11 animals).

12 **Figure 1 supplement 1: Defined areas in the RVM used for quantifying the location of**  
13 **retrogradely-labelled neurons.** The NRM was identified as a dense cluster of TPH2-  
14 expressing neurons around the midline in a triangular shape, whereas the LPGi were  
15 distinguished by their lateral location and separation from the midline structures. All other  
16 regions were defined as “other”. Examples of retrogradely labelled TPH2+ neurons in the  
17 NRM are indicated with arrows, the LPGi with filled arrowheads, and other with empty  
18 arrowheads, NRM = nucleus raphe magnus, LPGi = lateral paragigantocellularis, Pyr =  
19 Pyramids,

20 **Figure 1 supplement 2: Retrograde labelling of serotonergic hindbrain neurons with**  
21 **CTb.** A. injection scheme for CTb tracing from the lumbar dorsal horn and an example of the  
22 injection site in the lumbar spinal cord (scale bar = 200  $\mu\text{m}$ ). B. Example of a hindbrain  
23 section from the injection site shown in A (scale bars = 200  $\mu\text{m}$ ). The inset shows that many  
24 CTb-labelled neurons that express TPH2 are found in the nucleus raphe magnus (indicated  
25 by arrows). C. Location of CTb-labelled cells in the RVM that express TPH2, each datapoint  
26 is a count per animal (n = 2).

1 **Figure 1 supplement 3. Proportion of neurons retrogradely labelled with CTb and**  
2 **AAV2retro in different RVM areas.** A. Injection scheme for labelling descending projection  
3 neurons with AAV2retro and CTb. B. Quantification of coexpression of CTb and eGFP in all  
4 retrogradely-labelled RVM neurons, and C. Quantification of coexpression of CTb and eGFP  
5 in retrogradely-traced RVM neurons that contain TPH2. The proportion of retrogradely cells  
6 in each area expressing CTb, eGFP, or both eGFP and CTb are illustrated. The cell counts  
7 used to generate these charts are given in Table 1 (n = 3 animals).

8 **Figure 1 supplement 4: labelling of spinally-projecting serotonergic neurons with**  
9 **direct rabies infection and transsynaptic rabies tracing.** A. Injection strategy for the  
10 direct labelling of spinally-projecting hindbrain neurons with a SAD pseudotyped and G-  
11 protein deficient rabies virus. B. Example of a cell body of a labelled hindbrain neuron that is  
12 immunoreactive for TPH2 (scale bar = 50  $\mu\text{m}$ ), the ventral border of the hindbrain is indicated  
13 by the dotted line. C. Quantification of the GFP-labelled hindbrain neurons that express  
14 detectable levels of TPH2. Note that 7 days after rabies virus injection there are fewer  
15 labelled neurons that express TPH2. N = 3 animals. D. Injection strategy for the  
16 transsynaptic tracing of neurons from spinal dorsal horn neurons. Hoxb8-Cre is transiently  
17 expressed in all lumbar dorsal horn neurons and is crossed with ROSA26<sup>TVA</sup> to induce TVA  
18 expression in all spinal neurons. E. Example of an RVM neuron traced transsynaptically from  
19 the spinal dorsal horn (scale bar = 50  $\mu\text{m}$ ) F. Quantification of GFP-labelled neurons in the  
20 hindbrain that express detectable TPH2. Data from C. “5 days post injection” is included to  
21 allow comparison between directly labelled and transsynaptically traced neurons. N = 4  
22 animals for transsynaptic tracing experiment.

23 **Figure 2: Labelling of spinally-projecting neurons in the TPH2::Cre mouse with**  
24 **AAV2retro vectors.** A. Injection scheme for labelling spinally-projecting TPH2::Cre neurons.  
25 B. An example of a hindbrain section containing neurons labelled with eGFP (scale bar = 200  
26  $\mu\text{m}$ ). Inset is an enlargement of the area indicated in the dashed box, with many eGFP

1 labelled cells found to express detectable TPH2 that are indicated with arrows. Cells that  
2 were labelled with eGFP not containing detectable TPH2 are indicated with arrowheads. C.  
3 Image of an ipsilateral DRG from a TPH2::Cre mouse that received a spinal injection of  
4 AAV2retro.flex.eGFP, showing many eGFP-expressing neurons (scale bar = 100  $\mu$ m). D.  
5 Quantification of the location of eGFP-labelled cells in the hindbrain. E. Quantification of the  
6 hindbrain neurons labelled with eGFP that also contain TPH2. For D. and E. each datapoint  
7 is a count per animal (n = 3 animals). F. Injection scheme for the intersectional labelling of  
8 spinally-projecting TPH2::Cre neurons. Brain injection coordinates (-6, +/-0.5, 5.9) from  
9 bregma, for the labelling of spinally-projecting TPH2::Cre neurons in the LPGi, according to  
10 the mouse brain atlas. Target injection sites are indicated in red crosshairs. G. Example of a  
11 hindbrain section from a TPH2::Cre mouse that received the injections illustrated in F (scale  
12 bar = 500  $\mu$ m). Inset is an enlargement of the boxed area and highlights neurons that were  
13 captured with the brain injection and express eGFP (arrowheads) as well as neurons that  
14 were directly labelled from the spinal cord injection (mCherry+) that were not transduced  
15 from the hindbrain injection (arrows). Scale bar = 200  $\mu$ m H. Quantification of the mCherry-  
16 expressing cells that are labelled with eGFP, which indicated that they were captured with  
17 the hindbrain injection. The percentages of mCherry-only and eGFP-only cells are also  
18 quantified for each hindbrain area that contains serotonergic neurons, and areas that could  
19 not be assigned as either medial or LPGi were classified as “other” (n = 4 animals)

20 **Figure 3: Spinal cord regions innervated by serotonergic hindbrain neurons. A.**

21 Injection scheme for labelling medially located serotonergic neurons of the hindbrain with  
22 AAVs. Stereotaxic injection coordinates for the hindbrain injection of AAVs to label midline  
23 neurons without transducing LPGi serotonergic neurons (-6, 0, 5.9). B. Representative brain  
24 injection site from the hindbrain of a TPH2::Cre mouse that received a single 300nl injection  
25 of AAV8.hSyn.flex.eGFP (Scale bar = 500  $\mu$ m). A higher magnification image of the injection  
26 site is also shown (scale bar = 100  $\mu$ m). C. Quantification of the proportion of eGFP-labelled  
27 neurons in the injection site that were immunoreactive for TPH2. D. Intersectional strategy to

1 preferentially label the spinal axon terminals of descending serotonergic neurons that  
2 originate in the LPGi. E. Representative images of the hindbrain injection site and the axon  
3 termination pattern in the spinal cord of a TPH2::Cre animal that received the injections  
4 depicted in D (scale bars = 500  $\mu\text{m}$  and 100  $\mu\text{m}$  for hindbrain and spinal cord sections  
5 respectively). F. Injection scheme for labelling medially located serotonergic neurons with  
6 tdTOM. G. Representative images of the hindbrain injection site and spinal cord axon  
7 termination pattern of a TPH2::Cre animal that received a single 300nl injection of  
8 AAV8.hSyn.flex.tdTOM depicted in F (scale bars = 500  $\mu\text{m}$  and 100  $\mu\text{m}$  for hindbrain and  
9 spinal cord sections respectively). H. Higher magnification images of the cervical and lumbar  
10 dorsal horns of a TPH2::Cre animal that received the injections depicted in D (scale bar =  
11 100  $\mu\text{m}$ ). I. Representative images from cervical and lumbar spinal cord segments of animals  
12 that received an injection with AAV8.hSyn.flex.tdTOM into the NRM (scale bar = 100  $\mu\text{m}$ ).

13 Figure 3 - figure supplement 1. Laminar location of axons originating from descending LPGi  
14 and midline serotonergic neurons of the hindbrain. A. Intersectional labelling of TPH2::Cre  
15 hindbrain neurons in the LPGi, axons and terminals are found within laminae I-Ilo,  
16 highlighted by CGRP immunostaining. B. Direct labelling of medial serotonergic hindbrain  
17 neurons with AAV vectors, most labelled axons are found ventral to the lamina II-III border  
18 delineated by PKC $\gamma$  immunoreactivity. Scale bars = 100  $\mu\text{m}$ , laminae I-Ilo and Ili are  
19 indicated by the dotted lines.

20 **Figure 4: Electrophysiological characterization of serotonergic neurons of the NRM**  
21 **and the LPGi.** A. Current step protocol (red) and resulting AP firing (black) from  
22 representative serotonergic NRM and LPGi neurons recorded in current clamp. B.  
23 Current/frequency plot for the AP firing frequency of NRM and LPGi neurons resulting from  
24 increasing 1s depolarizing current injections. C. Representative images of biocytin filled  
25 neurons within the NRM and LPGi of hindbrain slices revealed following recording (scale bar  
26 = 200  $\mu\text{m}$ ). D – H comparison of active and passive membrane properties between NRM and

1 LPGi serotonergic neurons. D – G. n = 10 NRM (from 4 animals) n = 8 LPGi (from 3  
2 animals). H. n = 9 NRM n = 5 LPGi

3 **Figure 5: Chemogenetic activation of descending serotonergic LPGi neurons. A.**

4 Injection scheme for expressing the excitatory DREADD hM3Dq in spinally-projecting  
5 TPH2::Cre neurons. Brain injection coordinates according to the mouse brain atlas (-6, +/-  
6 0.5, 5.9 from bregma). B. Example of the injection site from the hindbrain of a mouse that  
7 received a spinal dorsal horn injection of AAV2retro.flex.FLPo.BFP followed by a bilateral  
8 hindbrain injection of AAV1.FRT.hM3Dq.mCherry one week later (scale bar = 200  $\mu$ m). C.  
9 Example of the ipsilateral spinal dorsal horn from an animal that had received the injections  
10 indicated in A . Note that most 5-HT-containing terminals are not labelled, but the majority of  
11 labelled terminals contain a detectable level of 5-HT (scale bar = 200  $\mu$ m). D. Sensory tests  
12 of the ipsilateral hindpaw: Hargreaves plantar assay; repeated measures one-way ANOVA,  
13 ( $F(3, 42) = 16.93, P < 0.0001$ ), post hoc tests with Bonferroni's correction detected  
14 differences between post-Vehicle and post CNO, as well as pre-CNO and post-CNO  
15 (adjusted P values are  $p = 0.007$  and  $p < 0.0001$  respectively) . Cold plantar assay; repeated  
16 measures one-way ANOVA, ( $F(3, 39) = 12.41, P < 0.0001$ ) post hoc tests with Bonferroni's  
17 correction detected differences between post-Vehicle and post CNO, as well as pre-CNO  
18 and post-CNO (adjusted P values are  $p = 0.0122$  and  $p = 0.0103$  respectively). von Frey test;  
19 repeated measures one-way ANOVA, ( $F(3, 39) = 0.5013 P = 0.6836$ ). Rotarod test for  
20 sensorimotor coordination/sedation; repeated measures one-way ANOVA, ( $F(3, 30) =$   
21  $0.8684, P = 0.4683$ ). Significance: \* $p < 0.05$ , \*\* $p < 0.01$ , \*\*\* $p < 0.001$ .

22 **Figure 5 figure supplement 1. Chemogenetic activation of hM3Dq-labelled neurons. A.**

23 Hindbrain containing hM3Dq-mCherry labelled neurons that upregulated c-Fos following  
24 intraperitoneal injection of CNO (scale bar = 200  $\mu$ m). B. Quantification of the proportion of  
25 hM3Dq-mCherry neurons that upregulated c-Fos after CNO or Vehicle injection (CNO n = 2,  
26 Vehicle n = 3).



1 **Figure 5 figure supplement 2: Altered sensitivity of the contralateral paw following**

2 **LPGi activation.** Sensory tests of the contralateral hindpaw: Hargreaves plantar assay;  
3 repeated measures one-way ANOVA, ( $F(3, 9) = 4.833$ ,  $P = 0.0081$ ). Post-hoc tests with  
4 Bonferroni correction detect differences between pre and post CNO injection, and between  
5 post-Vehicle and post-CNO injection in the Hargreaves plantar assay. Significance:  $**p <$   
6  $0.01$ ,  $***p < 0.001$ . ( $n = 15$  animals).

7 **Figure 5 figure supplement 3: Both male and female mice show alterations in thermal**  
8 **thresholds following chemogenetic activation of LPGi serotonergic neurons.** Sensory

9 and motor tests with groups divided into male and female animals. Increases in withdrawal  
10 latencies are seen in the Hargreaves and cold plantar assay in both male and female  
11 animals (paired t-tests post Vehicle vs post CNO with Holm-Sidak correction).  $N = 6$  male  
12 and 9 female animals Hargreaves, 6 male and 8 female for Cold plantar assay and von Frey,  
13 and 6 male and 5 female for Rotarod. Significance:  $*p < 0.05$ ,  $**p < 0.01$ ,  $***p < 0.001$ .

14 **Figure 5 figure supplement 4: CNO does not alter response latencies, thresholds or**  
15 **sensorimotor coordination in the absence of hM3Dq.** Sensory tests before and after the

16 injection of either CNO or Vehicle ( $n = 5$  animals). post-Vehicle vs post-CNO paired t-test,  
17 Hargreaves  $p = 0.239$ , Cold plantar  $p = 0.461$ , von Frey  $p = 0.424$ , Rotarod  $p = 0.732$ .

18 **Figure 5 figure supplement 5: Proportion of AAV2retro-traced neurons labelled with**  
19 **hM3Dq-mCherry for behavioral experiments.** Quantification of the hindbrain neurons

20 labelled from the injection scheme depicted in Figure 5A.  $n = 4$  animals.

21 **Figure 6: Chemogenetic activation of medial serotonergic hindbrain neurons. A.**

22 Injection scheme for chemogenetic activation of medial serotonergic hindbrain neurons.

23 Stereotaxic coordinates used for activating midline serotonergic neurons of  $TPH2::Cre$

24 animals with hM3D(q)-containing AAVs (-6, 0, 5.9). B. Example of an injection site from an

25 experiment to activate midline serotonergic neurons with hM3D(q). C. Lumbar spinal cord

26 from the injection site shown in B. showing mCherry-expressing terminals located ventral to

1 the dense 5-HT innervation of the superficial dorsal horn. D. Sensory and sensorimotor  
2 coordination assays of animals following CNO or Vehicle injections. Repeated one-way  
3 ANOVA, followed by Bonferroni's post-hoc tests for von Frey ( $F(3, 6) = 13.84$ ,  $P < 0.0001$ )  
4 show significant decreases between post-Vehicle and post-CNO injections ( $p = 0.0005$ ) as  
5 well as pre-CNO and post-CNO ( $p < 0.0001$ ). Significance: \* $p < 0.05$ , \*\* $p < 0.01$ , \*\*\* $p < 0.001$ .

6 **Figure 6 figure supplement 1: Injection sites for chemogenetic activation of medial**  
7 **serotonergic neurons of the hindbrain.** In all cases, spread is restricted to the medial  
8 neurons with limited spread to the LPGi serotonergic neurons. The targeted region of the  
9 hindbrain was the NRM at (-6, 0, 5.9) relative to Bregma according to the mouse brain atlas.  
10 In many cases, hM3Dq-mCherry-expressing neurons are also seen in the Raphe Obscuris  
11 (ROb), and the Raphe Pallidus (RPa).

12 **Figure 6 figure supplement 2: Both male and female animals show increase in**  
13 **mechanical hypersensitivity during chemogenetic activation of medial serotonergic**  
14 **hindbrain neurons.** Sensory and motor tests of male and female animals 1-3 hours after  
15 CNO or Vehicle injection. A decrease in withdrawal threshold is seen in both male and  
16 female animals for the von Frey test (paired t-tests post Vehicle vs post CNO with Holm-  
17 Sidak correction).  $N = 5$  male and 6 female animals for all tests. Significance: \* $p < 0.05$ , \*\* $p <$   
18  $0.01$ , \*\*\* $p < 0.001$ .

19 **Figure 6 figure supplement 3: Proportion of neurons labelled in chemogenetic**  
20 **experiments that express TPH2.** Summary of the proportion of hM3Dq-mCherry neurons  
21 labelled in the medial hindbrain that also express detectable TPH2 ( $n = 3$  animals)

22

## 1 References

- 2 [1] Abe K, Kato G, Katafuchi T, Tamae A, Furue H, Yoshimura M. Responses to 5-HT in morphologically  
3 identified neurons in the rat substantia gelatinosa in vitro. *Neuroscience* 2009;159(1):316-  
4 324.
- 5 [2] Albisetti GW, Ghanem A, Foster E, Conzelmann KK, Zeilhofer HU, Wildner H. Identification of Two  
6 Classes of Somatosensory Neurons That Display Resistance to Retrograde Infection by Rabies  
7 Virus. *J Neurosci* 2017;37(43):10358-10371.
- 8 [3] Albisetti GW, Pagani M, Platonova E, Hösli L, Johannssen HC, Fritschy JM, Wildner H, Zeilhofer HU.  
9 Dorsal Horn Gastrin-Releasing Peptide Expressing Neurons Transmit Spinal Itch But Not Pain  
10 Signals. *J Neurosci* 2019;39(12):2238-2250.
- 11 [4] Bannister K, Dickenson AH. What do monoamines do in pain modulation? *Curr Opin Support*  
12 *Palliat Care* 2016;10(2):143-148.
- 13 [5] Bannister K, Lockwood S, Goncalves L, Patel R, Dickenson AH. An investigation into the inhibitory  
14 function of serotonin in diffuse noxious inhibitory controls in the neuropathic rat. *Eur J Pain*  
15 2017;21(4):750-760.
- 16 [6] Bannister K, Patel R, Goncalves L, Townson L, Dickenson AH. Diffuse noxious inhibitory controls  
17 and nerve injury: restoring an imbalance between descending monoamine inhibitions and  
18 facilitations. *Pain* 2015;156(9):1803-1811.
- 19 [7] Bardoni R. Serotonergic Modulation of Nociceptive Circuits in Spinal Cord Dorsal Horn. *Curr*  
20 *Neuropharmacol* 2019;17(12):1133-1145.
- 21 [8] Basbaum AI, Clanton CH, Fields HL. Opiate and stimulus-produced analgesia: functional anatomy  
22 of a medullospinal pathway. *Proc Natl Acad Sci U S A* 1976;73(12):4685-4688.
- 23 [9] Basbaum AI, Fields HL. Endogenous pain control systems: brainstem spinal pathways and  
24 endorphin circuitry. *Annu Rev Neurosci* 1984;7:309-338.
- 25 [10] Basbaum AI, Marley NJ, O'Keefe J, Clanton CH. Reversal of morphine and stimulus-produced  
26 analgesia by subtotal spinal cord lesions. *Pain* 1977;3(1):43-56.
- 27 [11] Brenner DS, Golden JP, Gereau RWt. A novel behavioral assay for measuring cold sensation in  
28 mice. *PLoS One* 2012;7(6):e39765.
- 29 [12] Brust RD, Corcoran AE, Richerson GB, Nattie E, Dymecki SM. Functional and developmental  
30 identification of a molecular subtype of brain serotonergic neuron specialized to regulate  
31 breathing dynamics. *Cell Rep* 2014;9(6):2152-2165.
- 32 [13] Butkevich IP, Barr GA, Vershinina EA. Sex differences in formalin-induced pain in prenatally  
33 stressed infant rats. *Eur J Pain* 2007;11(8):888-894.
- 34 [14] Cai YQ, Wang W, Hou YY, Pan ZZ. Optogenetic activation of brainstem serotonergic neurons  
35 induces persistent pain sensitization. *Mol Pain* 2014;10:70.
- 36 [15] Cameron D, Polgár E, Gutierrez-Mecinas M, Gomez-Lima M, Watanabe M, Todd AJ. The  
37 organisation of spinoparabrachial neurons in the mouse. *Pain* 2015;156(10):2061-2071.
- 38 [16] Cavanaugh DJ, Chesler AT, Jackson AC, Sigal YM, Yamanaka H, Grant R, O'Donnell D, Nicoll RA,  
39 Shah NM, Julius D, Basbaum AI. Trpv1 reporter mice reveal highly restricted brain  
40 distribution and functional expression in arteriolar smooth muscle cells. *J Neurosci*  
41 2011;31(13):5067-5077.
- 42 [17] Cavanaugh DJ, Lee H, Lo L, Shields SD, Zylka MJ, Basbaum AI, Anderson DJ. Distinct subsets of  
43 unmyelinated primary sensory fibers mediate behavioral responses to noxious thermal and  
44 mechanical stimuli. *Proc Natl Acad Sci U S A* 2009;106(22):9075-9080.
- 45 [18] Coull JA, Boudreau D, Bachand K, Prescott SA, Nault F, Sik A, De Koninck P, De Koninck Y. Trans-  
46 synaptic shift in anion gradient in spinal lamina I neurons as a mechanism of neuropathic  
47 pain. *Nature* 2003;424(6951):938-942.
- 48 [19] Dahlstrom A, Fuxe K. Localization of monoamines in the lower brain stem. *Experientia*  
49 1964;20(7):398-399.

- 1 [20] Das Gupta RR, Scheurer L, Pelczar P, Wildner H, Zeilhofer HU. Neuron-specific spinal cord  
2 translatomes reveal a neuropeptide code for mouse dorsal horn excitatory neurons. *Sci Rep*  
3 2021;11(1):5232.
- 4 [21] Depuy SD, Kanbar R, Coates MB, Stornetta RL, Guyenet PG. Control of breathing by raphe  
5 obscurus serotonergic neurons in mice. *J Neurosci* 2011;31(6):1981-1990.
- 6 [22] Dhaka A, Earley TJ, Watson J, Patapoutian A. Visualizing cold spots: TRPM8-expressing sensory  
7 neurons and their projections. *J Neurosci* 2008;28(3):566-575.
- 8 [23] Duan B, Cheng L, Bourane S, Britz O, Padilla C, Garcia-Campmany L, Krashes M, Knowlton W,  
9 Velasquez T, Ren X, Ross S, Lowell BB, Wang Y, Goulding M, Ma Q. Identification of spinal  
10 circuits transmitting and gating mechanical pain. *Cell* 2014;159(6):1417-1432.
- 11 [24] Foster E, Wildner H, Tudeau L, Haueter S, Ralvenius WT, Jegen M, Johannssen H, Hösli L,  
12 Haenraets K, Ghanem A, Conzelmann KK, Bösl M, Zeilhofer HU. Targeted ablation, silencing,  
13 and activation establish glycinergic dorsal horn neurons as key components of a spinal gate  
14 for pain and itch. *Neuron* 2015;85(6):1289-1304.
- 15 [25] Francois A, Low SA, Sypek EI, Christensen AJ, Sotoudeh C, Beier KT, Ramakrishnan C, Ritola KD,  
16 Sharif-Naeini R, Deisseroth K, Delp SL, Malenka RC, Luo L, Hantman AW, Scherrer G. A  
17 Brainstem-Spinal Cord Inhibitory Circuit for Mechanical Pain Modulation by GABA and  
18 Enkephalins. *Neuron* 2017;93(4):822-839.e826.
- 19 [26] Ganley RP, Werder K, Wildner H, Zeilhofer HU. Spinally projecting noradrenergic neurons of the  
20 locus coeruleus display resistance to AAV2retro-mediated transduction. *Mol Pain*  
21 2021;17:17448069211037887.
- 22 [27] Gao K, Mason P. Serotonergic Raphe magnus cells that respond to noxious tail heat are not ON  
23 or OFF cells. *J Neurophysiol* 2000;84(4):1719-1725.
- 24 [28] Gao K, Mason P. The discharge of a subset of serotonergic raphe magnus cells is influenced by  
25 baroreceptor input. *Brain Res* 2001;900(2):306-313.
- 26 [29] Gatto G, Bourane S, Ren X, Di Costanzo S, Fenton PK, Halder P, Seal RP, Goulding MD. A  
27 Functional Topographic Map for Spinal Sensorimotor Reflexes. *Neuron* 2020.
- 28 [30] Gautier A, Geny D, Bourgoin S, Bernard JF, Hamon M. Differential innervation of superficial  
29 versus deep laminae of the dorsal horn by bulbo-spinal serotonergic pathways in the rat.  
30 *IBRO Rep* 2017;2:72-80.
- 31 [31] Gomez JL, Bonaventura J, Lesniak W, Mathews WB, Sysa-Shah P, Rodriguez LA, Ellis RJ, Richie CT,  
32 Harvey BK, Dannals RF, Pomper MG, Bonci A, Michaelides M. Chemogenetics revealed:  
33 DREADD occupancy and activation via converted clozapine. *Science* 2017;357(6350):503-507.
- 34 [32] Haenraets K, Albisetti GW, Foster E, Wildner H. Adeno-associated Virus-mediated Transgene  
35 Expression in Genetically Defined Neurons of the Spinal Cord. *J Vis Exp* 2018(135).
- 36 [33] Haring M, Zeisel A, Hochgerner H, Rinwa P, Jakobsson JET, Lonnerberg P, La Manno G, Sharma N,  
37 Borgius L, Kiehn O, Lagerstrom MC, Linnarsson S, Ernfors P. Neuronal atlas of the dorsal horn  
38 defines its architecture and links sensory input to transcriptional cell types. *Nat Neurosci*  
39 2018;21(6):869-880.
- 40 [34] Hennessy ML, Corcoran AE, Brust RD, Chang Y, Nattie EE, Dymecki SM. Activity of Tachykinin1-  
41 Expressing Pet1 Raphe Neurons Modulates the Respiratory Chemoreflex. *J Neurosci*  
42 2017;37(7):1807-1819.
- 43 [35] Hirschberg S, Li Y, Randall A, Kremer EJ, Pickering AE. Functional dichotomy in spinal- vs  
44 prefrontal-projecting locus coeruleus modules splits descending noradrenergic analgesia  
45 from ascending aversion and anxiety in rats. *Elife* 2017;6.
- 46 [36] Huang J, Polgar E, Solinski HJ, Mishra SK, Tseng PY, Iwagaki N, Boyle KA, Dickie AC, Kriegbaum  
47 MC, Wildner H, Zeilhofer HU, Watanabe M, Riddell JS, Todd AJ, Hoon MA. Circuit dissection  
48 of the role of somatostatin in itch and pain. *Nat Neurosci* 2018;21(5):707-716.
- 49 [37] Iceman KE, Richerson GB, Harris MB. Medullary serotonin neurons are CO<sub>2</sub> sensitive in situ. *J*  
50 *Neurophysiol* 2013;110(11):2536-2544.
- 51 [38] Jeong HJ, Mitchell VA, Vaughan CW. Role of 5-HT(1) receptor subtypes in the modulation of pain  
52 and synaptic transmission in rat spinal superficial dorsal horn. *Br J Pharmacol*  
53 2012;165(6):1956-1965.

- 1 [39] Kaur S, Benton WL, Tongkhuya SA, Lopez CMC, Uphouse L, Averitt DL. Sex Differences and  
2 Estrous Cycle Effects of Peripheral Serotonin-Evoked Rodent Pain Behaviors. *Neuroscience*  
3 2018;384:87-100.
- 4 [40] Kawashima T. The role of the serotonergic system in motor control. *Neurosci Res* 2018;129:32-  
5 39.
- 6 [41] Kwiat GC, Basbaum AI. The origin of brainstem noradrenergic and serotonergic projections to  
7 the spinal cord dorsal horn in the rat. *Somatosens Mot Res* 1992;9(2):157-173.
- 8 [42] Li L, Rutlin M, Abaira VE, Cassidy C, Kus L, Gong S, Jankowski MP, Luo W, Heintz N, Koerber HR,  
9 Woodbury CJ, Ginty DD. The functional organization of cutaneous low-threshold  
10 mechanosensory neurons. *Cell* 2011;147(7):1615-1627.
- 11 [43] Liu MZ, Chen XJ, Liang TY, Li Q, Wang M, Zhang XY, Li YZ, Sun Q, Sun YG. Synaptic control of  
12 spinal GRPR(+) neurons by local and long-range inhibitory inputs. *Proc Natl Acad Sci U S A*  
13 2019.
- 14 [44] Lu Y, Perl ER. Selective action of noradrenaline and serotonin on neurones of the spinal  
15 superficial dorsal horn in the rat. *J Physiol* 2007;582(Pt 1):127-136.
- 16 [45] Mason P, Gao K, Genzen JR. Serotonergic raphe magnus cell discharge reflects ongoing  
17 autonomic and respiratory activities. *J Neurophysiol* 2007;98(4):1919-1927.
- 18 [46] Maxwell DJ, Leranath C, Verhofstad AA. Fine structure of serotonin-containing axons in the  
19 marginal zone of the rat spinal cord. *Brain Res* 1983;266(2):253-259.
- 20 [47] Millan MJ. Descending control of pain. *Prog Neurobiol* 2002;66(6):355-474.
- 21 [48] Mogil JS. Sex differences in pain and pain inhibition: multiple explanations of a controversial  
22 phenomenon. *Nat Rev Neurosci*, Vol. 13. England, 2012. pp. 859-866.
- 23 [49] Okaty BW, Commons KG, Dymecki SM. Embracing diversity in the 5-HT neuronal system. *Nat Rev*  
24 *Neurosci* 2019;20(7):397-424.
- 25 [50] Pedersen NP, Vaughan CW, Christie MJ. Opioid receptor modulation of GABAergic and  
26 serotonergic spinally projecting neurons of the rostral ventromedial medulla in mice. *J*  
27 *Neurophysiol* 2011;106(2):731-740.
- 28 [51] Peirs C, Williams SG, Zhao X, Arokiaraj CM, Ferreira DW, Noh MC, Smith KM, Halder P, Corrigan  
29 KA, Gedeon JY, Lee SJ, Gatto G, Chi D, Ross SE, Goulding M, Seal RP. Mechanical Allodynia  
30 Circuitry in the Dorsal Horn Is Defined by the Nature of the Injury. *Neuron* 2020.
- 31 [52] Peirs C, Williams SP, Zhao X, Walsh CE, Gedeon JY, Cagle NE, Goldring AC, Hioki H, Liu Z, Marell  
32 PS, Seal RP. Dorsal Horn Circuits for Persistent Mechanical Pain. *Neuron* 2015;87(4):797-812.
- 33 [53] Polgar E, Puskar Z, Watt C, Matesz C, Todd AJ. Selective innervation of lamina I projection  
34 neurones that possess the neurokinin 1 receptor by serotonin-containing axons in the rat  
35 spinal cord. *Neuroscience* 2002;109(4):799-809.
- 36 [54] Porreca F, Burgess SE, Gardell LR, Vanderah TW, Malan TP, Jr., Ossipov MH, Lappi DA, Lai J.  
37 Inhibition of neuropathic pain by selective ablation of brainstem medullary cells expressing  
38 the mu-opioid receptor. *J Neurosci* 2001;21(14):5281-5288.
- 39 [55] Potrebic SB, Fields HL, Mason P. Serotonin immunoreactivity is contained in one physiological  
40 cell class in the rat rostral ventromedial medulla. *J Neurosci* 1994;14(3 Pt 2):1655-1665.
- 41 [56] Richerson GB, Wang W, Tiwari J, Bradley SR. Chemosensitivity of serotonergic neurons in the  
42 rostral ventral medulla. *Respir Physiol* 2001;129(1-2):175-189.
- 43 [57] Ridet JL, Rajaofetra N, Teilhac JR, Geffard M, Privat A. Evidence for nonsynaptic serotonergic and  
44 noradrenergic innervation of the rat dorsal horn and possible involvement of neuron-glia  
45 interactions. *Neuroscience* 1993;52(1):143-157.
- 46 [58] Sharif B, Ase AR, Ribeiro-da-Silva A, Séguéla P. Differential Coding of Itch and Pain by a  
47 Subpopulation of Primary Afferent Neurons. *Neuron* 2020;106(6):940-951.e944.
- 48 [59] Suzuki R, Morcuende S, Webber M, Hunt SP, Dickenson AH. Superficial NK1-expressing neurons  
49 control spinal excitability through activation of descending pathways. *Nat Neurosci*  
50 2002;5(12):1319-1326.
- 51 [60] Tervo DG, Hwang BY, Viswanathan S, Gaj T, Lavzin M, Ritola KD, Lindo S, Michael S, Kuleshova E,  
52 Ojala D, Huang CC, Gerfen CR, Schiller J, Dudman JT, Hantman AW, Looger LL, Schaffer DV,

- 1 Karpova AY. A Designer AAV Variant Permits Efficient Retrograde Access to Projection  
2 Neurons. *Neuron* 2016;92(2):372-382.
- 3 [61] Todd AJ. Neuronal circuitry for pain processing in the dorsal horn. *Nat Rev Neurosci*  
4 2010;11(12):823-836.
- 5 [62] Todd AJ. Plasticity of inhibition in the spinal cord. *Handb Exp Pharmacol* 2015;227:171-190.
- 6 [63] Tudeau L, Acuña MA, Albisetti GW, Neumann E, Ralvenius WT, Scheurer L, Poe M, Cook JM,  
7 Johannssen HC, Zeilhofer HU. Mice lacking spinal  $\alpha$ 2GABA(A) receptors: Altered GABAergic  
8 neurotransmission, diminished GABAergic antihyperalgesia, and potential compensatory  
9 mechanisms preventing a hyperalgesic phenotype. *Brain Res* 2020;1741:146889.
- 10 [64] Wang JK. Antinociceptive effect of intrathecally administered serotonin. *Anesthesiology*  
11 1977;47(3):269-271.
- 12 [65] Wang Z, Maunze B, Wang Y, Tsoulfas P, Blackmore MG. Global Connectivity and Function of  
13 Descending Spinal Input Revealed by 3D Microscopy and Retrograde Transduction. *J Neurosci*  
14 2018;38(49):10566-10581.
- 15 [66] Wei F, Dubner R, Zou S, Ren K, Bai G, Wei D, Guo W. Molecular depletion of descending  
16 serotonin unmasks its novel facilitatory role in the development of persistent pain. *J Neurosci*  
17 2010;30(25):8624-8636.
- 18 [67] West SJ, Bannister K, Dickenson AH, Bennett DL. Circuitry and plasticity of the dorsal horn--  
19 toward a better understanding of neuropathic pain. *Neuroscience* 2015;300:254-275.
- 20 [68] Wickersham IR, Finke S, Conzelmann KK, Callaway EM. Retrograde neuronal tracing with a  
21 deletion-mutant rabies virus. *Nat Methods* 2007;4(1):47-49.
- 22 [69] Wickersham IR, Lyon DC, Barnard RJ, Mori T, Finke S, Conzelmann KK, Young JA, Callaway EM.  
23 Monosynaptic restriction of transsynaptic tracing from single, genetically targeted neurons.  
24 *Neuron* 2007;53(5):639-647.
- 25 [70] Witschi R, Johansson T, Morscher G, Scheurer L, Deschamps J, Zeilhofer HU. Hoxb8-Cre mice: A  
26 tool for brain-sparing conditional gene deletion. *Genesis* 2010;48(10):596-602.
- 27 [71] Xie DJ, Uta D, Feng PY, Wakita M, Shin MC, Furue H, Yoshimura M. Identification of 5-HT  
28 receptor subtypes enhancing inhibitory transmission in the rat spinal dorsal horn in vitro.  
29 *Mol Pain* 2012;8:58.
- 30 [72] Yesilyurt O, Seyrek M, Tasdemir S, Kahraman S, Deveci MS, Karakus E, Halici Z, Dogrul A. The  
31 critical role of spinal 5-HT7 receptors in opioid and non-opioid type stress-induced analgesia.  
32 *Eur J Pharmacol* 2015;762:402-410.
- 33 [73] Zhang L, Sykes KT, Buhler AV, Hammond DL. Electrophysiological heterogeneity of spinally  
34 projecting serotonergic and nonserotonergic neurons in the rostral ventromedial medulla. *J*  
35 *Neurophysiol* 2006;95(3):1853-1863.
- 36 [74] Zhang W, Gardell S, Zhang D, Xie JY, Agnes RS, Badghisi H, Hruby VJ, Rance N, Ossipov MH,  
37 Vanderah TW, Porreca F, Lai J. Neuropathic pain is maintained by brainstem neurons co-  
38 expressing opioid and cholecystokinin receptors. *Brain* 2009;132(Pt 3):778-787.
- 39 [75] Zhang Y, Zhao S, Rodriguez E, Takatoh J, Han BX, Zhou X, Wang F. Identifying local and  
40 descending inputs for primary sensory neurons. *J Clin Invest* 2015;125(10):3782-3794.

41

42



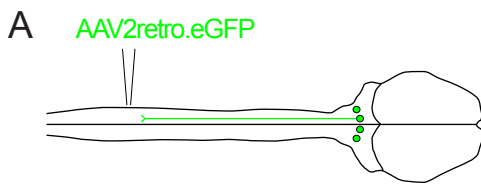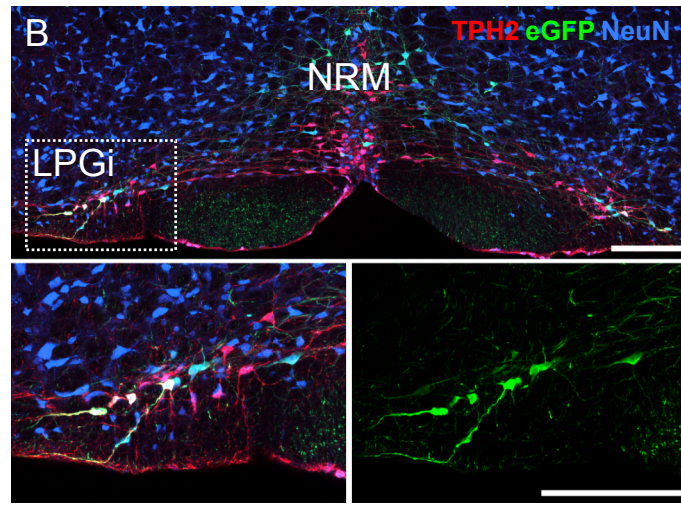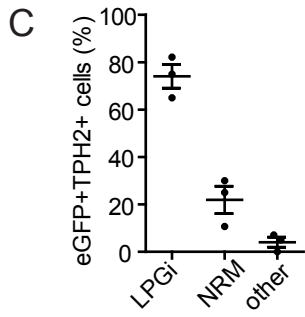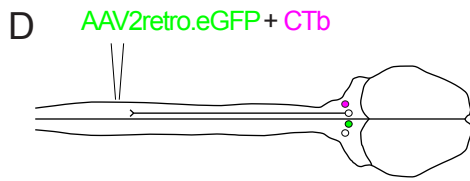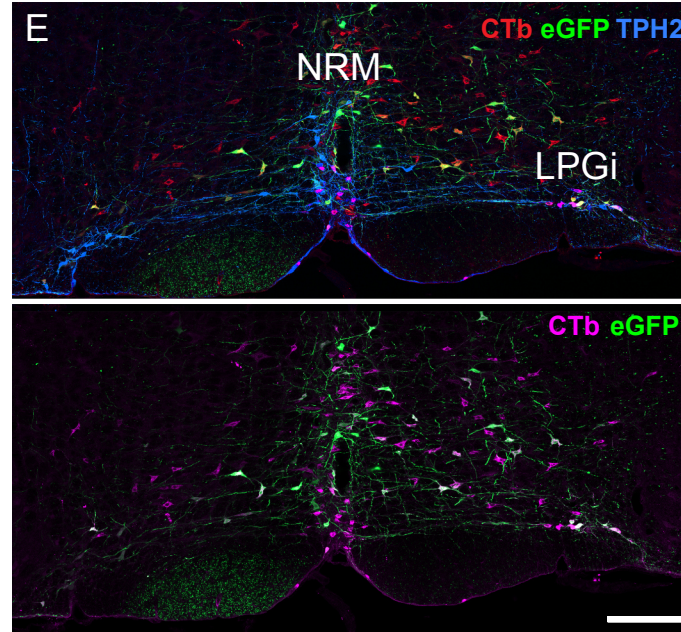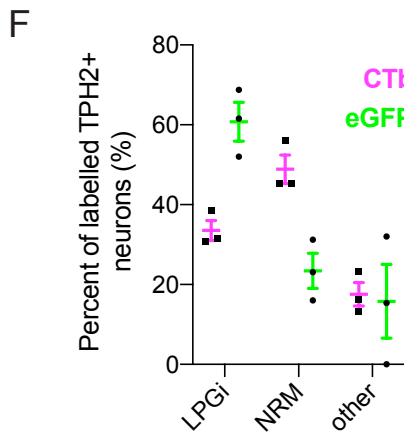

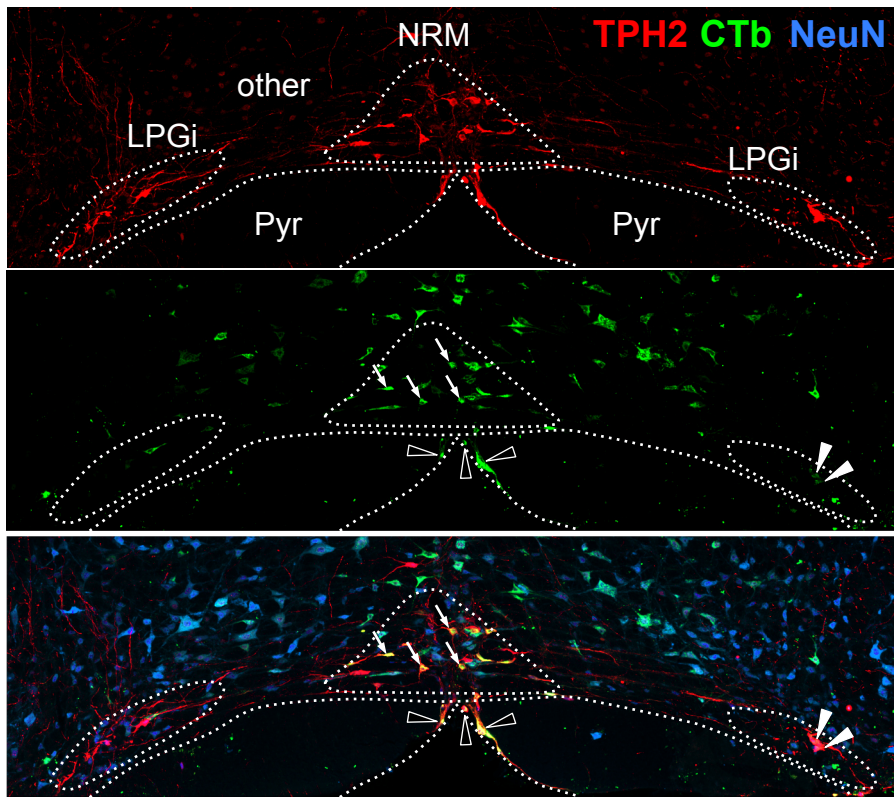



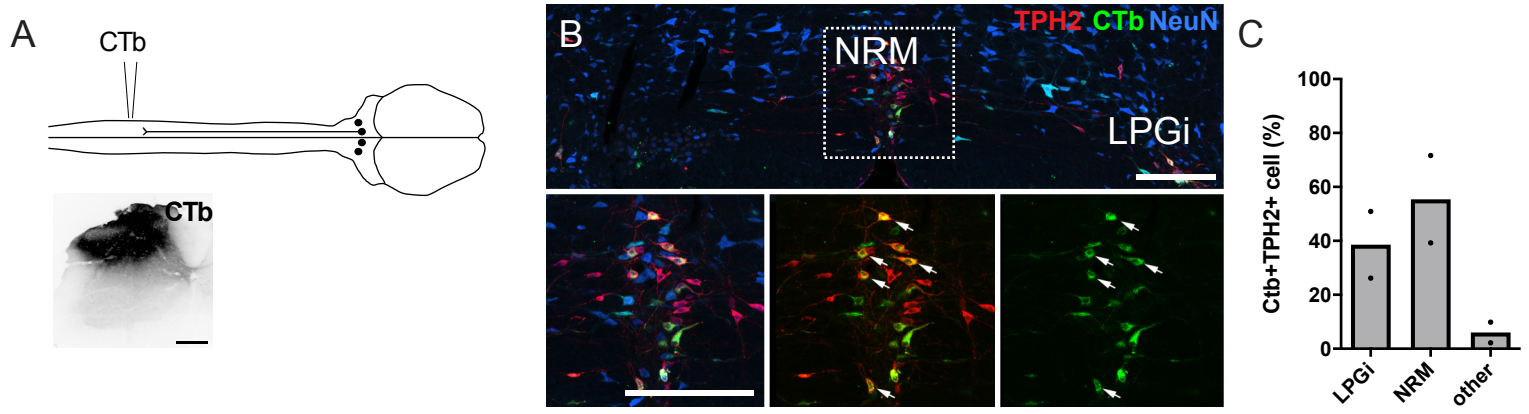

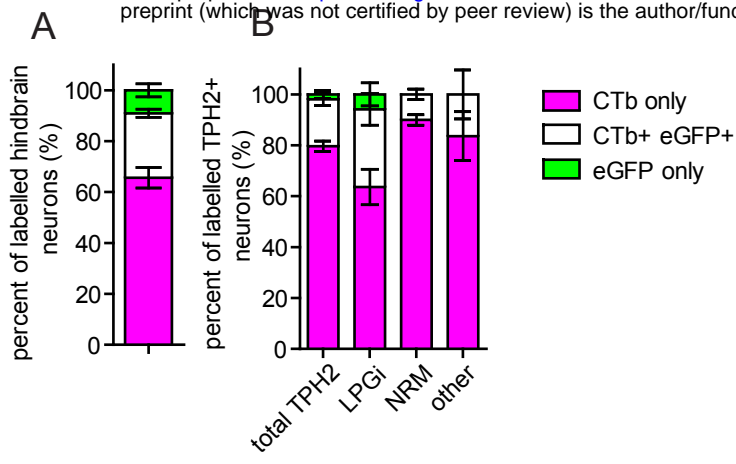

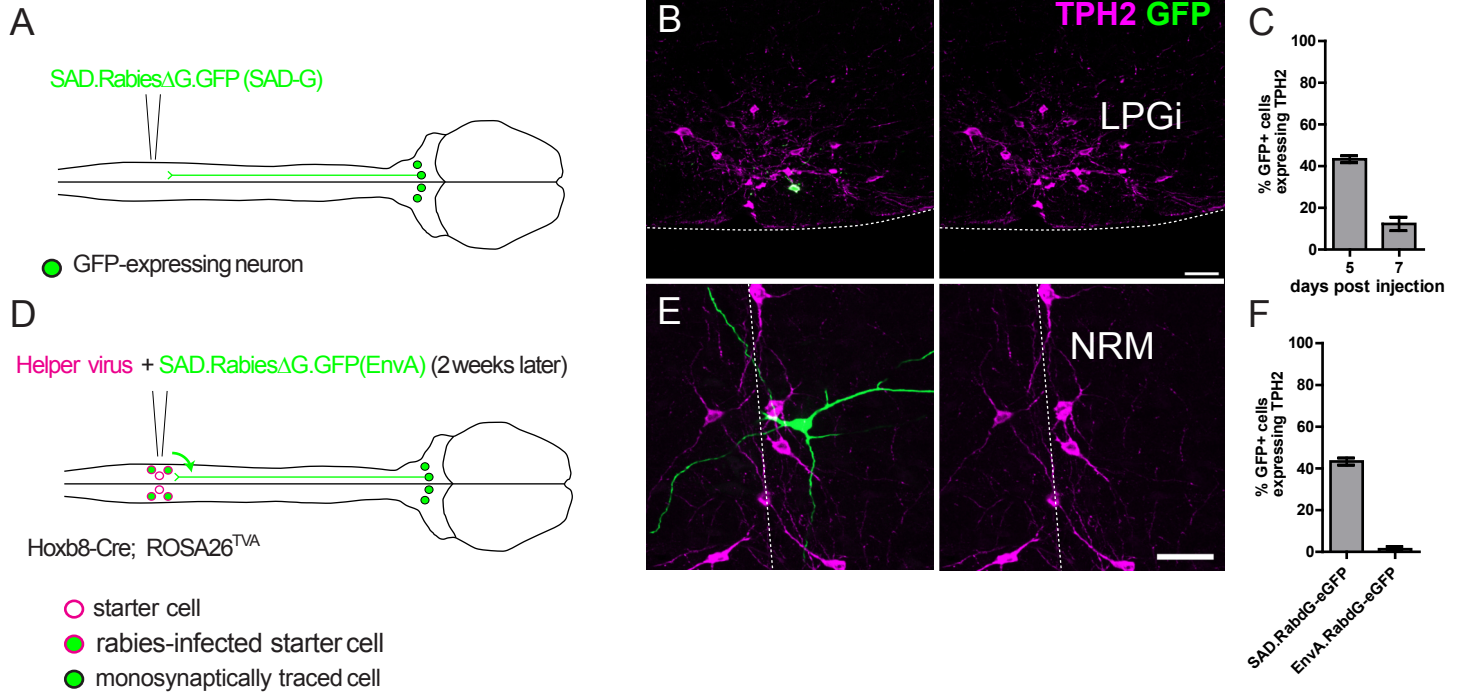

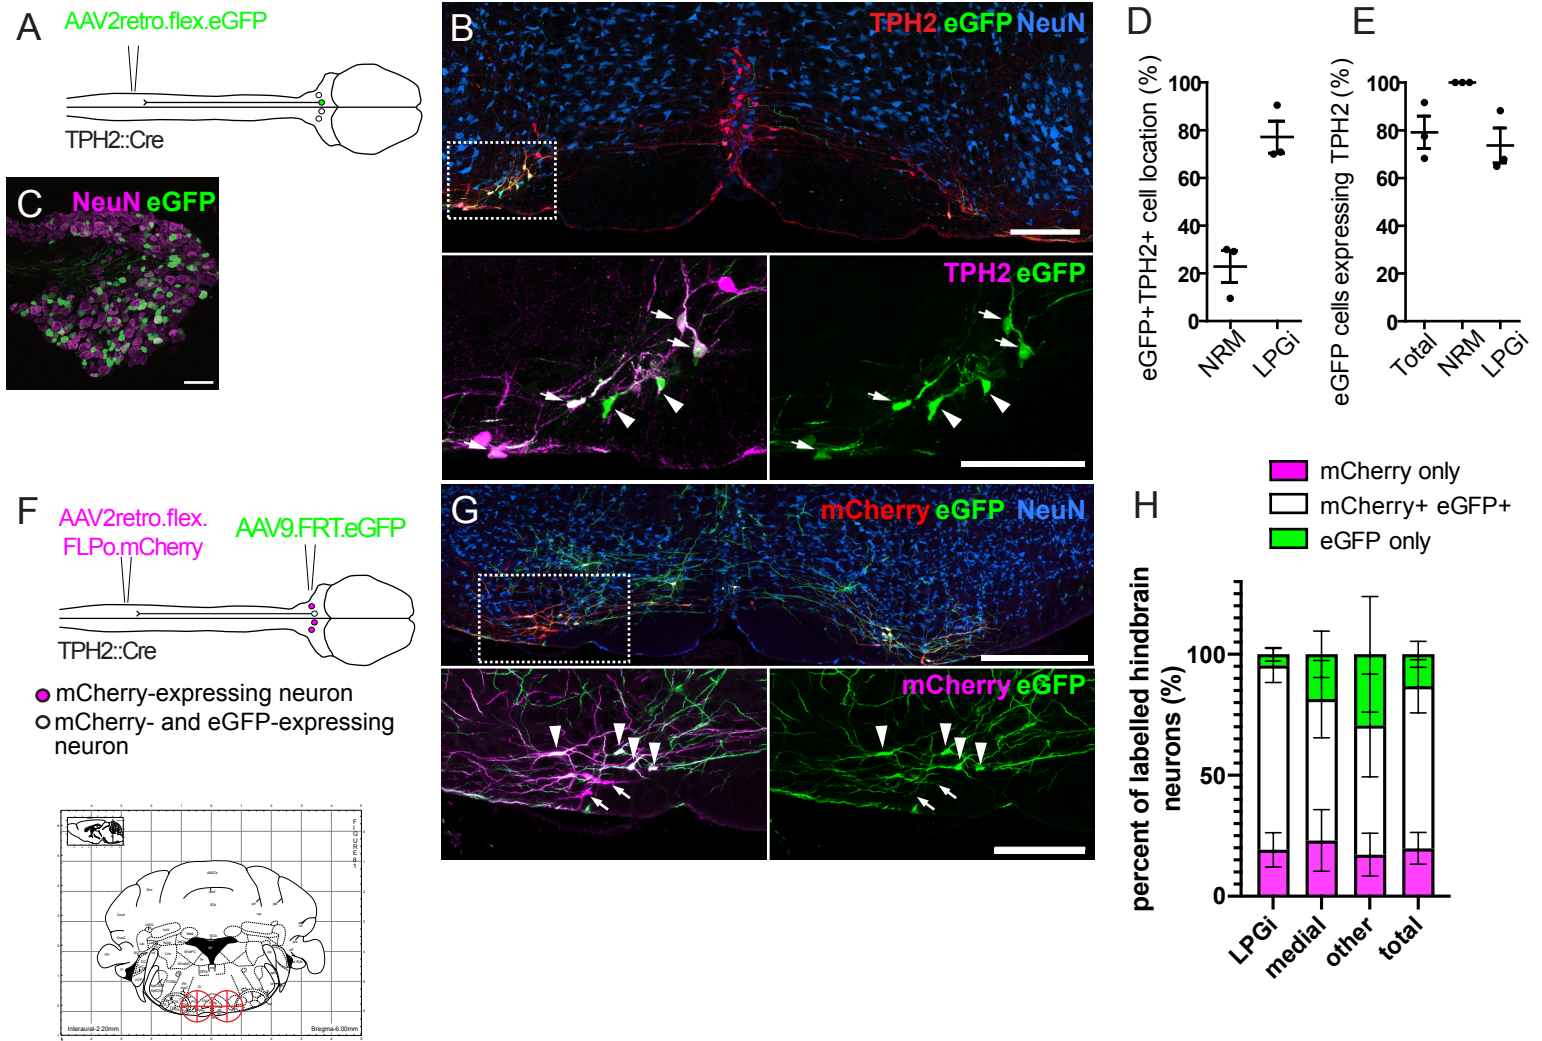



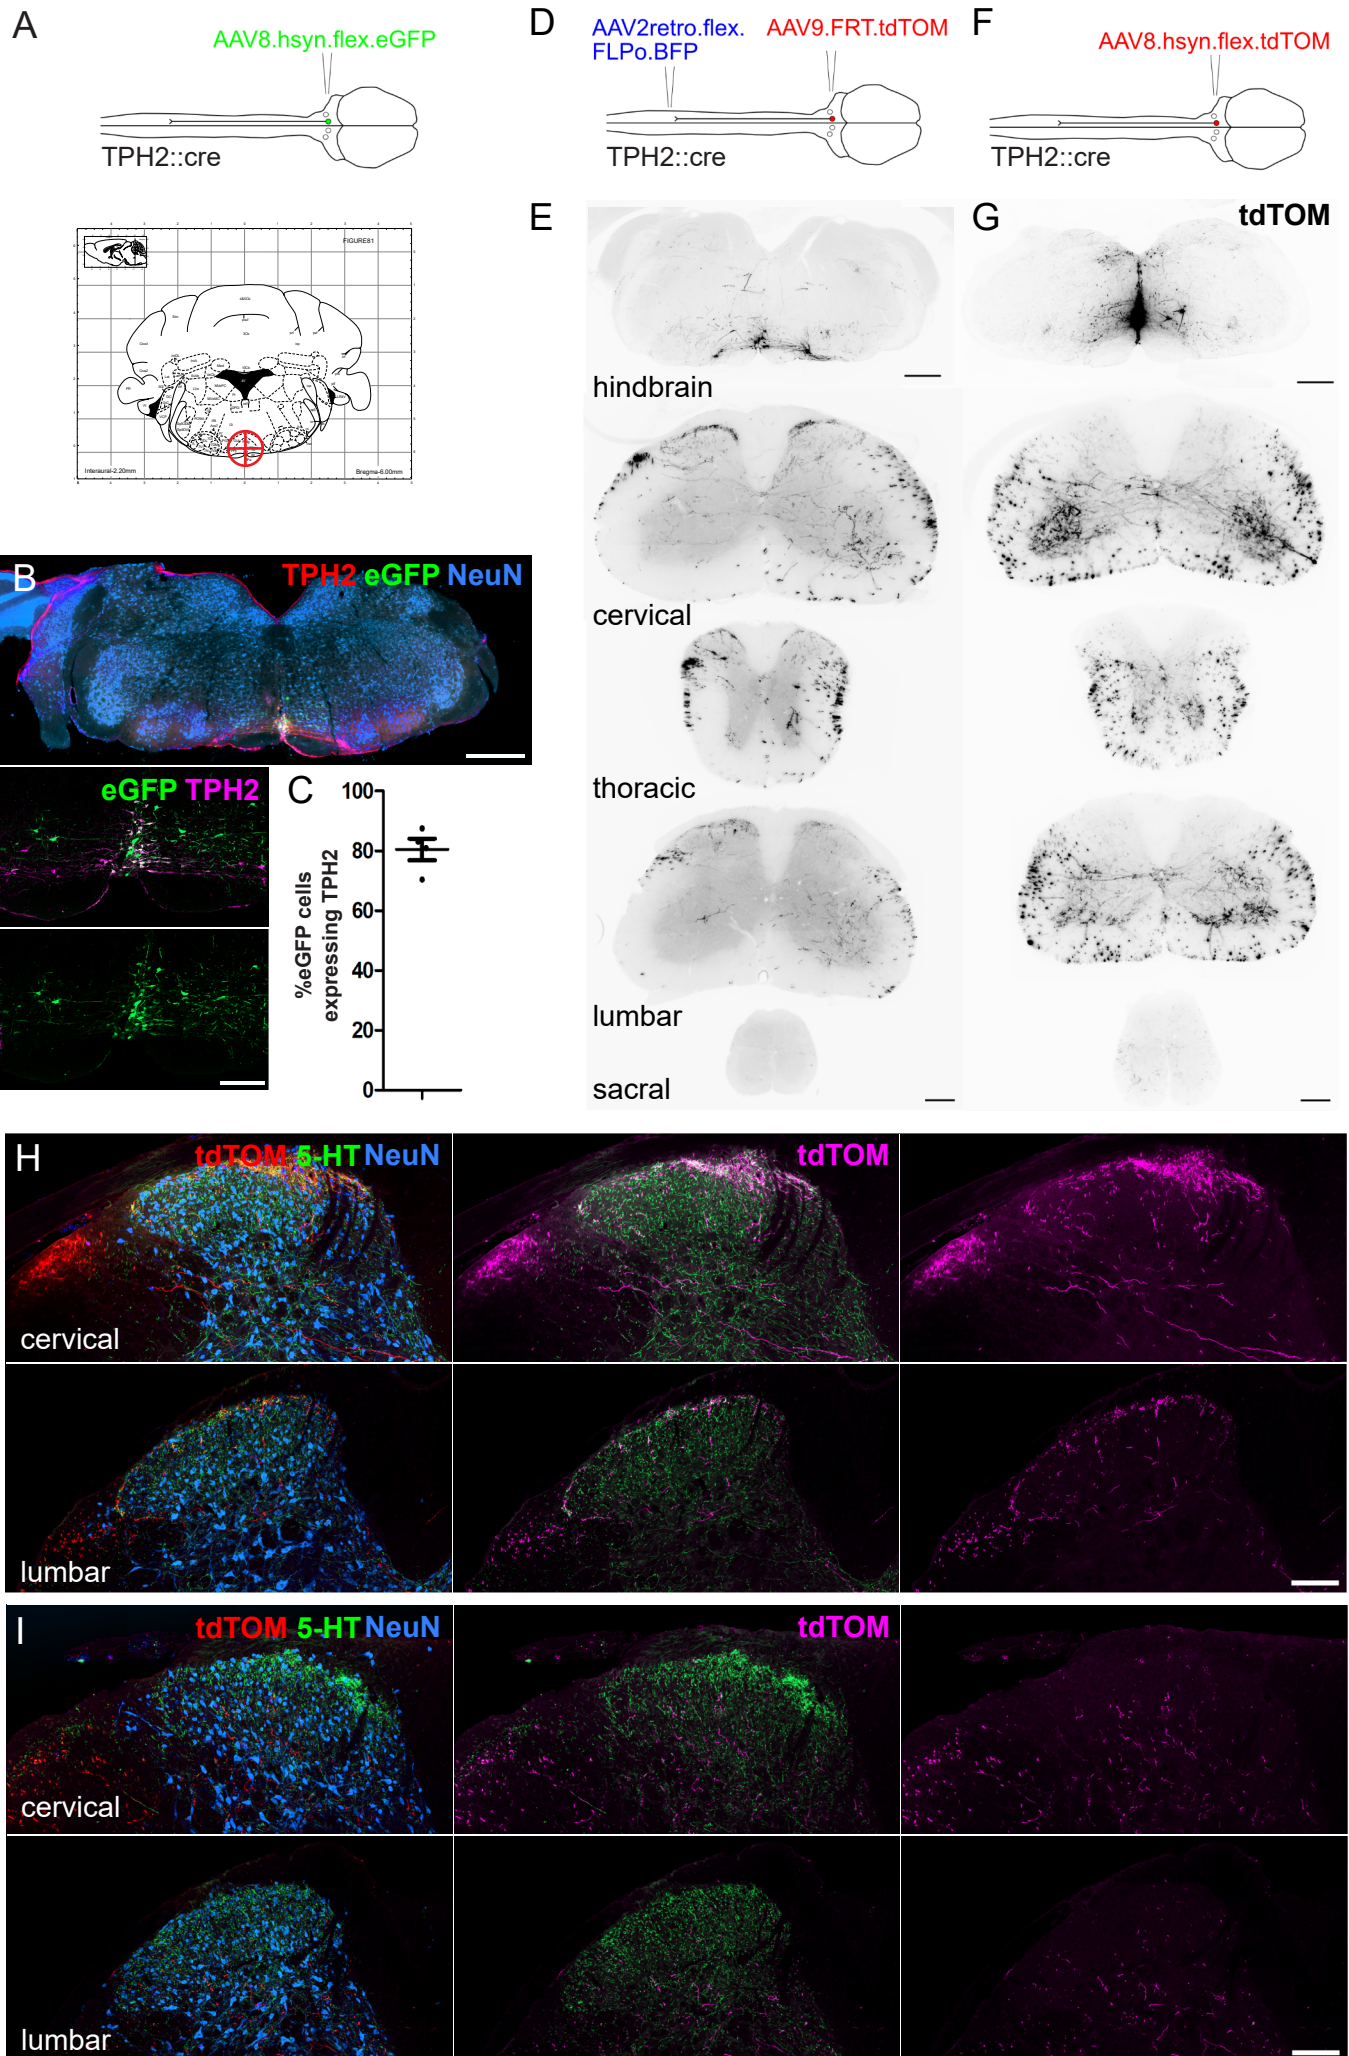

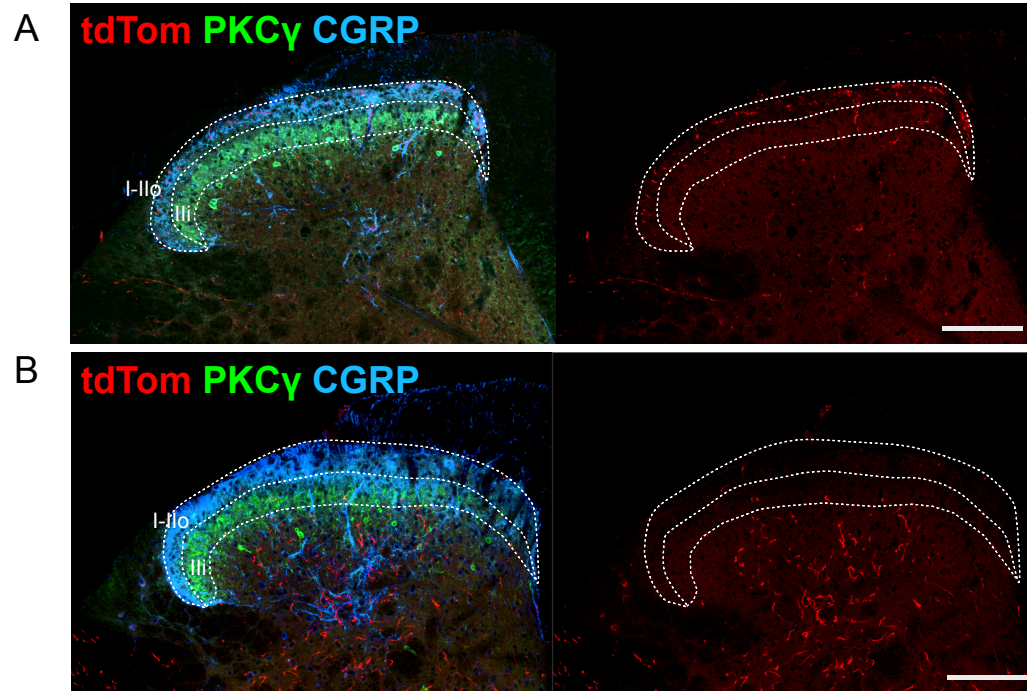

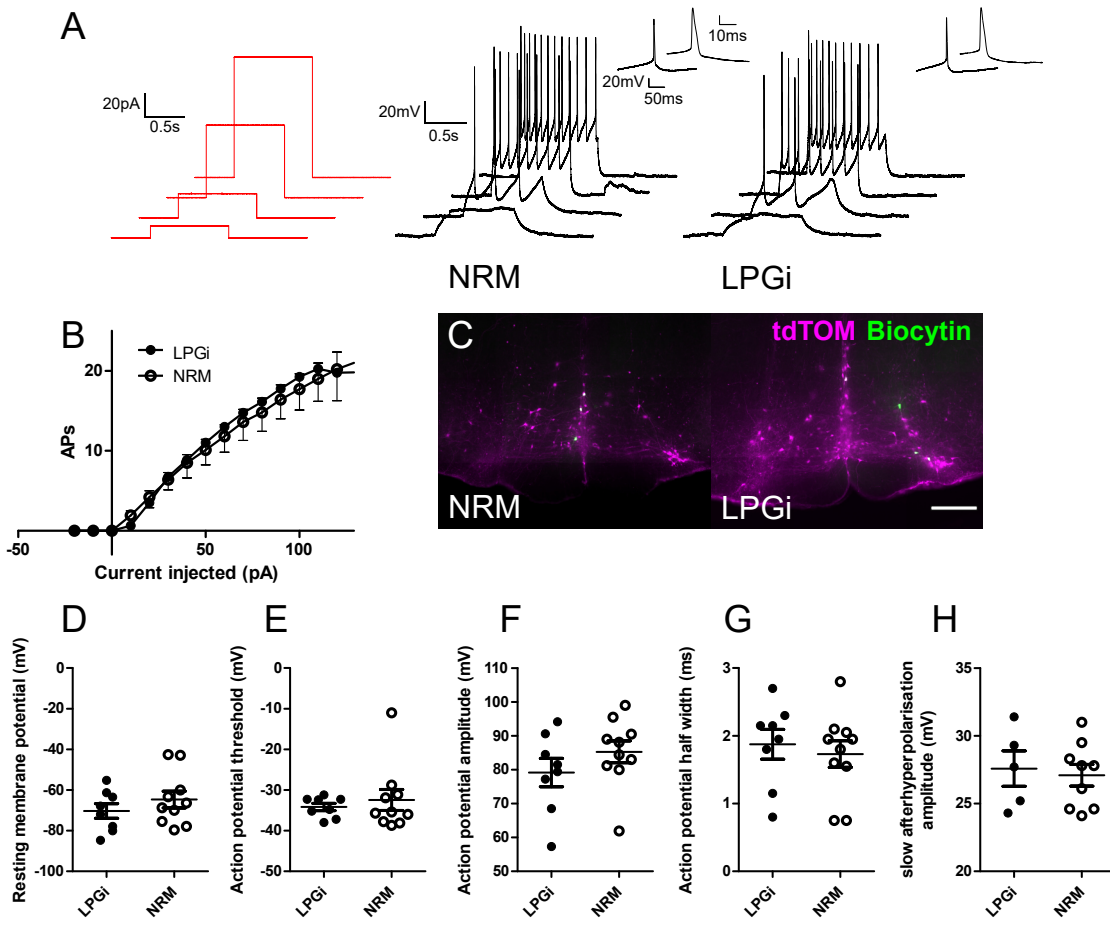



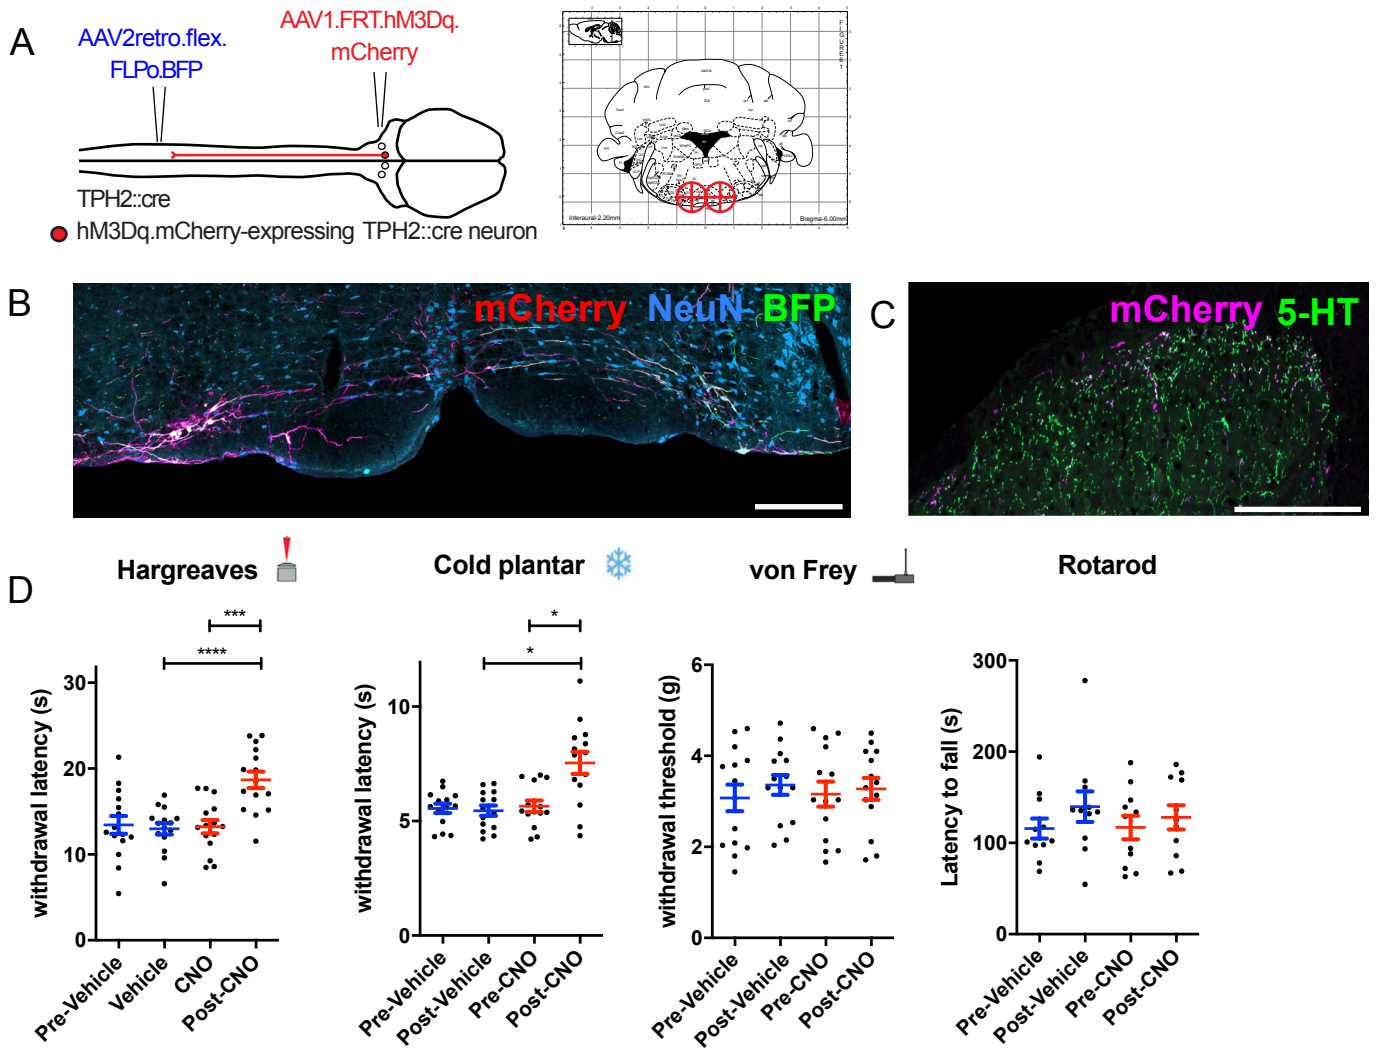



A

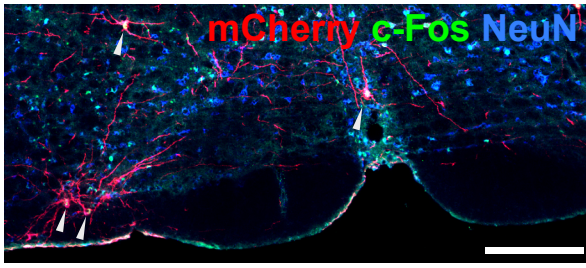

B

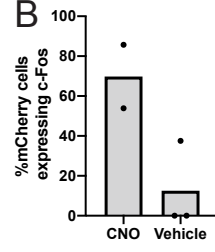

## CONTRA

Hargreaves 

Cold plantar 

von Frey 

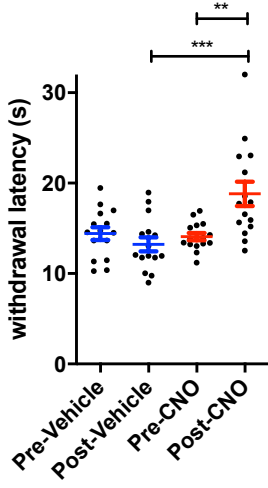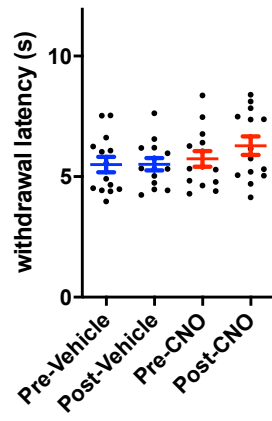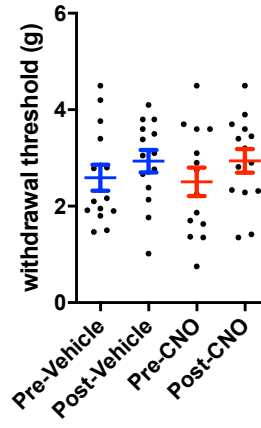

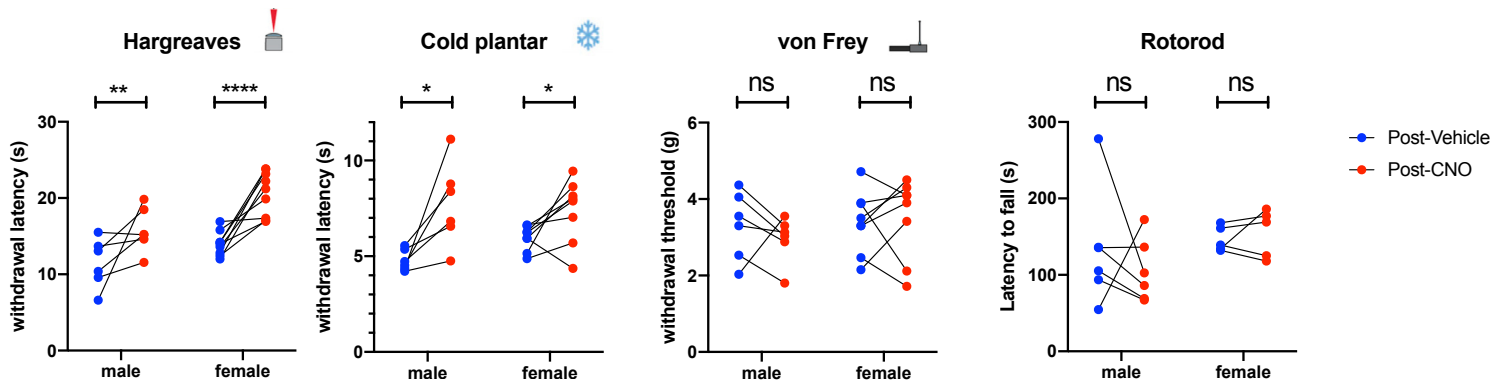

## without hM3Dq

Hargreaves 

Cold plantar 

von Frey 

Rotorod

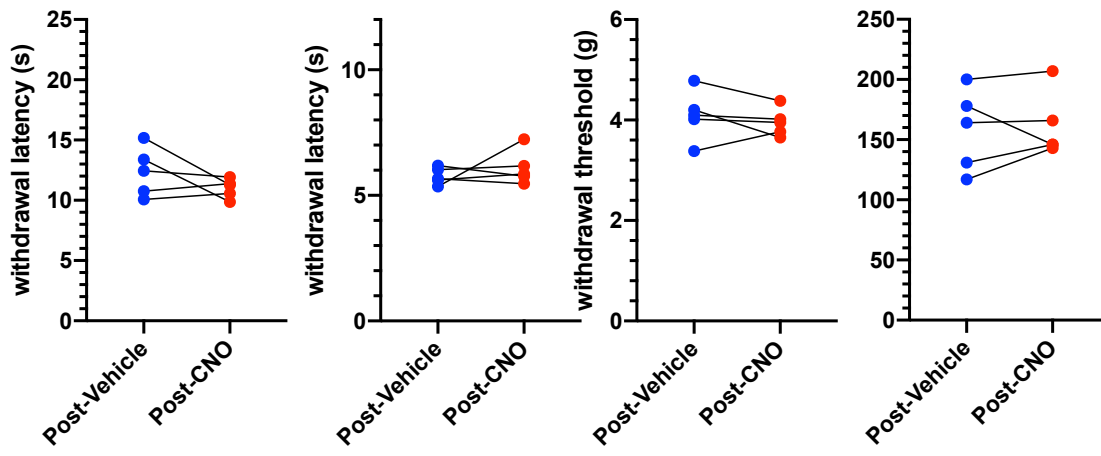

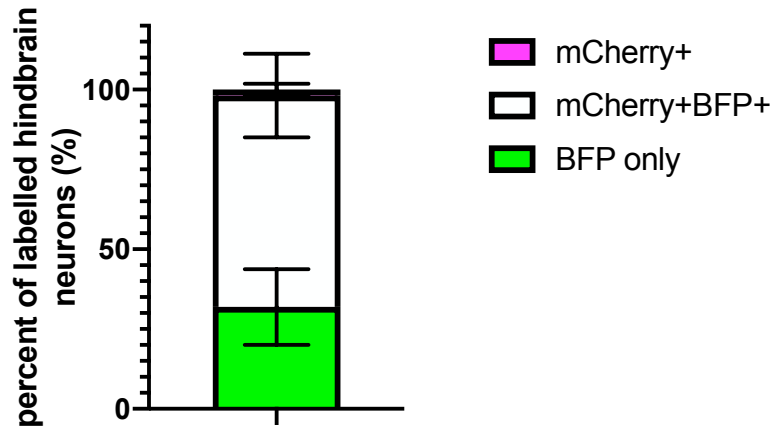

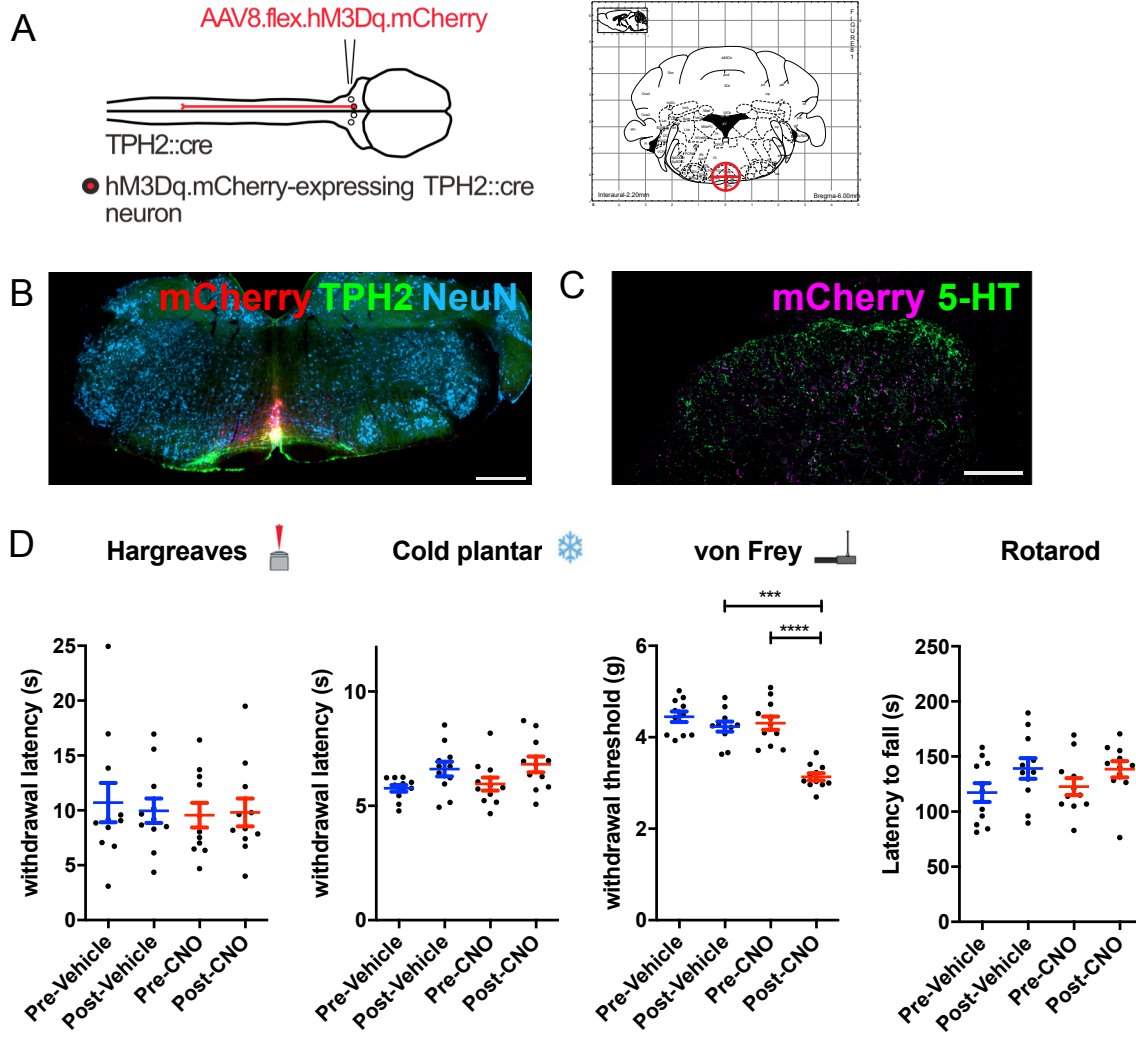

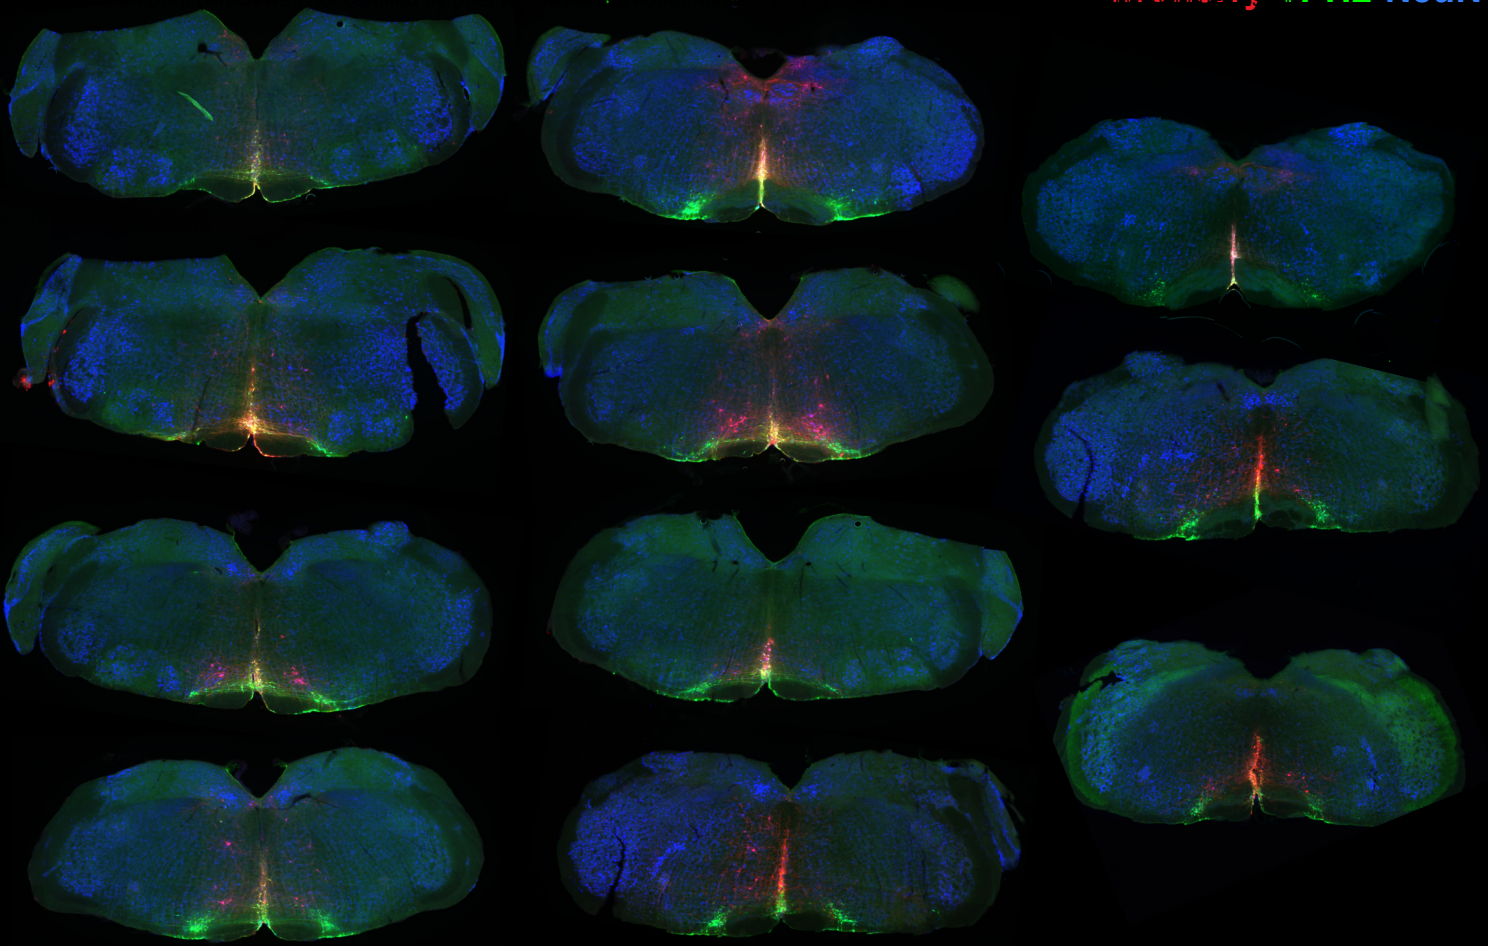

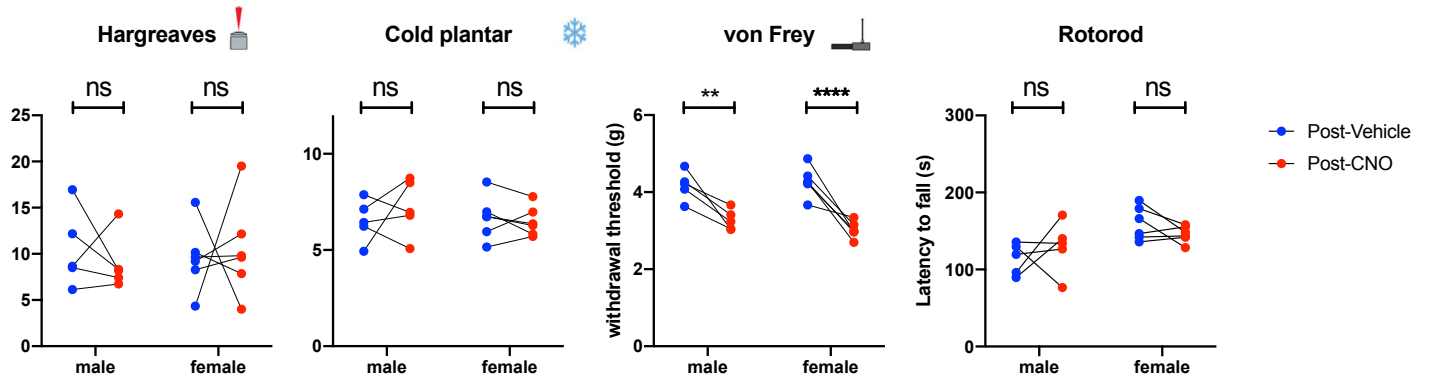



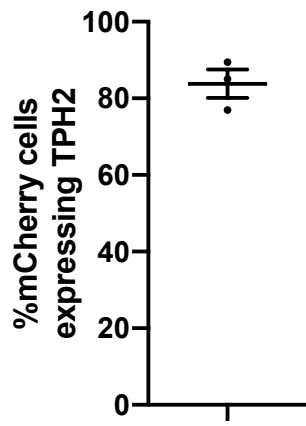

| Brain region        | Subset | GFP only     | Ctb only        | GFP+Ctb+       | %GFP only        | %Ctb only          | %GFP+Ctb+          |
|---------------------|--------|--------------|-----------------|----------------|------------------|--------------------|--------------------|
| RVM (all neurons)   | -      | 99 (11 - 57) | 679 (149 - 319) | 279 (65 - 134) | 9.1 (4.0 - 12.1) | 65.6 (59.7 - 73.3) | 25.3 (22.7 - 28.1) |
| RVM (TPH2+ neurons) | All    | 5 (0 - 4)    | 269 (63 - 123)  | 62 (12 - 25)   | 1.5 (0 - 5.1)    | 80.1 (76.1 - 83.1) | 18.5 (15.2 - 22.9) |
|                     | LPGi   | 5 (0 - 4)    | 79 (16 - 44)    | 35 (7 - 15)    | 4.2 (0 - 14.8)   | 66.4 (54.3 - 77.2) | 29.4 (22.8 - 42.9) |
|                     | NRM    | 0 (0 - 0)    | 143 (37 - 63)   | 15 (4 - 6)     | 0 (0 - 0)        | 90.5 (87.8 - 94.0) | 9.5 (6.0 - 12.2)   |
|                     | Other  | 0 (0 - 0)    | 47 (10 - 21)    | 12 (0 - 8)     | 0 (0 - 0)        | 79.7 (66.7 - 100)  | 20.3 (0 - 33.3)    |

1

2 Table 1: Quantification of hindbrain neurons traced from the spinal dorsal horn with AAV2retro.eGFP and CTb. The number in each column is  
3 the total number of cells counted for each group, with the range of cells counted for each animal in parentheses. For percentages, the average  
4 value is presented with the range for each animal given in parentheses.

5

1  
2  
3

| <b>labelling strategy</b> | <b>rabies virus</b>       | <b>animals</b> | <b>total GFP+ cells counted in RVM</b> | <b>GFP neurons expressing TPH2</b> | <b>GFP neurons not expressing TPH2</b> | <b>% GFP+ neurons that are TPH2+</b> |
|---------------------------|---------------------------|----------------|----------------------------------------|------------------------------------|----------------------------------------|--------------------------------------|
| direct infection (5d)     | SAD.RabiesΔG-eGFP (SAD-G) | 3              | 25 (5-11)                              | 11 (2-5)                           | 14 (3-6)                               | 44 (40-45)                           |
| direct infection (7d)     | SAD.RabiesΔG-eGFP (SAD-G) | 3              | 36 (7-17)                              | 4 (1-2)                            | 32 (6-16)                              | 11 (6-16)                            |
| monosynaptic tracing      | SAD.RabiesΔG-eGFP (EnvA)  | 4              | 33 (3-20)                              | 1 (0-1)                            | 32 (3-19)                              | 3 (0-5)                              |

4 Table 2: Neurons in the ventral hindbrain traced from the spinal cord with modified rabies viruses. Number represents the total number of cells  
5 counted with the range of cells counted for each animal in parentheses. Percentages of labelled neurons expressing TPH2 are the average for  
6 all cells counted per group, with the range for each animal given in parentheses.

| <b>GFP (all)</b> | <b>GFP (NRM)</b> | <b>GFP (LPGi)</b> | <b>GFP+ TPH2+ (all)</b> | <b>GFP+TPH2+ (NRM)</b> | <b>GFP+TPH2+ (LPGi)</b> |
|------------------|------------------|-------------------|-------------------------|------------------------|-------------------------|
| 127 (24-63)      | 25 (7 – 12)      | 102 (17 – 57)     | 96 (22 – 43)            | 25 (7 – 12)            | 71 (15 – 37)            |

1

2 Table 3: Cell counts for eGFP-labelled cells in the hindbrain from injection of AAV2retro.flex.eGFP into the spinal cord of TPH2::cre animals (n

3 = 3) the total number of cells counted is indicated and the range of cells counted per animal is indicated in parentheses.

| <b>Fluorophore</b> | <b>Total</b>   | <b>LPGi</b>   | <b>medial</b> | <b>Other</b> |
|--------------------|----------------|---------------|---------------|--------------|
| eGFP only          | 94 (19 – 29)   | 18 (1 – 8)    | 38 (6 – 16)   | 38 (5 – 20)  |
| eGFP+mCherry+      | 558 (72 – 224) | 298 (50 – 96) | 156 (13 – 69) | 104 (6 – 59) |
| mCherry only       | 153 (22 – 65)  | 71 (11 – 23)  | 55 (4 – 29)   | 27 (3 – 13)  |

- 1 Table 4: Cell counts for neurons labelled in the hindbrain from intersectional labelling experiments, from spinal cord injection of
- 2 AAV2retro.flex.FLPo.mCherry and hindbrain injection of AAV9.FRT.eGFP (n = 4 animals). Total number of cells counted is given with the range
- 3 of cells counted in parentheses.

| <b>Parameter</b>                               | <b>NRM</b>            | <b>LPGi</b>         |
|------------------------------------------------|-----------------------|---------------------|
| Membrane resistance (M $\Omega$ )              | 1643 $\pm$ 240.1      | 1857 $\pm$ 316.9    |
| Resting membrane potential (mV)                | -64.69 $\pm$ 4.145    | -70.32 $\pm$ 3.592  |
| Rheobase current (pA)                          | 18.75 $\pm$ 2.236     | 15.00 $\pm$ 2.266   |
| Action potential threshold (mV)                | -32.45 $\pm$ 2.597    | -34.18 $\pm$ 0.8890 |
| Action potential amplitude (mV)                | 85.26 $\pm$ 3.230     | 79.14 $\pm$ 4.194   |
| Action potential half width (ms)               | 1.730 $\pm$<br>0.1960 | 1.875 $\pm$ 0.2198  |
| Slow Afterhyperpolarisation (with AHP / total) | 9/10                  | 5/8                 |
| Slow Afterhyperpolarisation Amplitude (mV)     | 27.09 $\pm$<br>0.7983 | 27.58 $\pm$ 1.304   |

1

2 Table 5: Comparison of active and passive membrane properties between serotonergic  
3 neurons in the NRM and the LPGi. Data are shown as mean  $\pm$  SEM (n = 10 cells from 4  
4 animals NRM , n= 8 cells from 3 animals LPGi)

| Mouse line           | Supplier/source        | Reference             |
|----------------------|------------------------|-----------------------|
| TPH2::cre            | The Jackson Laboratory | MGI: 5435520          |
| Hoxb8-cre            | Pawel Pelczar          | (Witschi et al. 2010) |
| ROSA26 <sup>TV</sup> | Dieter Sauer           | (Seidler et al. 2008) |

1

2 Table 6: Transgenic mouse lines used in this study

3 Seidler, B., A. Schmidt, U. Mayr, H. Nakhai, R. M. Schmid, G. Schneider & D. Saur (2008) A

4 Cre-loxP-based mouse model for conditional somatic gene expression and

5 knockdown in vivo by using avian retroviral vectors. *Proc Natl Acad Sci U S A*, 105,

6 10137-42.

7 Witschi, R., T. Johansson, G. Morscher, L. Scheurer, J. Deschamps & H. U. Zeilhofer (2010)

8 Hoxb8-Cre mice: A tool for brain-sparing conditional gene deletion. *Genesis*, 48, 596-

9 602.

10

| <b>Virus/tracer name</b>    | <b>Full name</b>                                                   | <b>Supplier/Source</b>            | <b>Cat#</b> |
|-----------------------------|--------------------------------------------------------------------|-----------------------------------|-------------|
| AAV2retro.eGFP              | ssAAV-retro/2-CAG-EGFP-WPRE-SV40p(A)                               | Viral Vector facility<br>UZH/ETHZ | V24-retro   |
| AAV2retro.flex.eGFP         | ssAAV-retro/2-shortCAG-dlox-EGFP(rev)-dlox-WPRE-SV40p(A)           | Viral Vector facility<br>UZH/ETHZ | V158-retro  |
| AAV2retro.flex.tdTomato     | ssAAV-retro/2-shortCAG-dlox-tdTomato(rev)-dlox-WPRE-hGHp(A)        | Viral Vector facility<br>UZH/ETHZ | V167-retro  |
| AAV2retro.flex.FLPo.BFP     | ssAAV-retro/2-hSyn1-chl-dlox-EBFP2_2A_FLPo(rev)-dlox-WPRE-SV40p(A) | Viral Vector facility<br>UZH/ETHZ | V175-retro  |
| AAV2retro.flex.FLPo.mCherry | ssAAV-retro/2-hSyn1-chl-mCherry_2A_FLPo-WPRE-SV40p(A)              | Viral Vector facility<br>UZH/ETHZ | V173-retro  |
| AAV9.flex.ChR2-YFP          | ssAAV-9/2-hEF1a-dlox-hChR2(H134R)_EYFP(rev)-dlox-WPRE-hGHp(A)      | Viral Vector facility<br>UZH/ETHZ | v214-9      |
| AAV8.FRT.tdTomato           | ssAAV-8/2-hSyn1-dlox-tdTomato(rev)-dlox-WPRE-bGHp(A)               | Viral Vector facility<br>UZH/ETHZ | v284-8      |
| AAV9.FRT.eGFP               | ssAAV-9/2-hSyn1-chl-dFRT-EGFP(rev)-dFRT-WPRE-                      | Viral Vector facility<br>UZH/ETHZ | V335-9      |



|                          |                                                                             |                                   |             |
|--------------------------|-----------------------------------------------------------------------------|-----------------------------------|-------------|
|                          | hGHp(A)                                                                     |                                   |             |
| AAV9.FRT.hM3D(q).mCherry | ssAAV-9-hSyn1-dFRT-<br>hM3D(Gq)-mCherry                                     | Viral Vector facility<br>UZH/ETHZ | V189-9      |
| AAV9.FRT.hM4D(i).mCherry | ssAAV-9/2-hSyn1-dFRT-<br>hM4D(Gi)_mCherry(rev)-dFRT-<br>WPRE-hGHp(A)        | Viral Vector facility<br>UZH/ETHZ | V190-9      |
| AAV9.FRT.Chr2-YFP        | ssAAV-9/2-hSyn1-dFRT-<br>hM4D(Gi)_mCherry(rev)-dFRT-<br>WPRE-hGHp(A)        | Viral Vector facility<br>UZH/ETHZ | V190-9      |
| AAV9/2.FRT.eGFP.TeTxLC   | ssAAV-9/2-hSyn1.chl-dFRT-<br>EGFP-2A-FLAG:TeTxLC(rev)-<br>dFRT-WPRE-hGHp(A) | Viral Vector facility<br>UZH/ETHZ | v450-9      |
| SAD pseudotyped rabies   | SAD.RabiesDG-eGFP (SAD-G)                                                   | Karl-Klaus Conzelmann             | N/A         |
| EnvA pseudotyped rabies  | SAD.RabiesDG-GFP (EnvA)                                                     | Karen Haenraets                   | N/A         |
| CTb                      | Cholera Toxin b subunit                                                     | Sigma Aldrich                     | C9903-.5MG/ |

1

2 Table 7: AAVs, rabies viruses, and retrograde tracers used in the study

3

| Antibody          | Host          | Supplier/Source                      | Cat#/RRID                  | Dilution |
|-------------------|---------------|--------------------------------------|----------------------------|----------|
| GFP               | Chicken       | LifeTech                             | A10262/<br>AB_2619988      | 1:1000   |
| TPH2              | Rabbit        | Novus Biologicals                    | NB100-<br>74555/AB_572263  | 1:1000   |
| Ctb               | Goat          | LIST biological<br>laboratories inc. | #703/AB_2314252            | 1:1000   |
| mCherry           | Goat          | Sicgen                               | AB0081-<br>200/AB_2333094  | 1:500    |
| tdTomato          | Goat          | Sicgen                               | AB8181-200/<br>AB_2722750  | 1:500    |
| 5-HT              | Rabbit        | ImmunoStar                           | 20080/AB_572263            | 1:1000   |
| NeuN              | Guinea<br>pig | Synaptic systems                     | 266004/AB_2619988          | 1:1000   |
| Chicken-Alexa 488 | Donkey        | Jackson<br>ImmunoResearch            | 703-546-<br>155/AB_2340376 | 1:500    |
| Goat-Cy3          | Donkey        | Jackson<br>ImmunoResearch            | 705-166-<br>147/AB_2340413 | 1:500    |

|                      |        |                           |                            |       |
|----------------------|--------|---------------------------|----------------------------|-------|
| Goat-Alexa 488       | Donkey | Jackson<br>ImmunoResearch | 795-546-147/ -             | 1:500 |
| Guinea pig-Alexa 647 | Donkey | Jackson<br>ImmunoResearch | 706-496-148/ -             | 1:500 |
| Rabbit-Alexa 647     | Donkey | Jackson<br>ImmunoResearch | 711-607-<br>003/AB_2340626 | 1:500 |
| Rabbit-Cy3           | Donkey | Jackson<br>ImmunoResearch | 711-165-<br>152/AB_2307443 | 1:500 |

1

2 Table 8: Antibodies used in the study
